# Supplementary material
Source: PubMed Central journal article supplement (PMC5755966)

*Supporting Information for*

**Highly diastereo- and enantioselective synthesis of trifluoromethyl-substituted cyclopropanes via myoglobin-catalyzed transfer of trifluoromethylcarbene.**

Antonio Tinoco, Viktoria Steck, Vikas Tyagi and Rudi Fasan\*

*Department of Chemistry, University of Rochester, 14627 Rochester, New York, USA*

*Correspondence should be addressed to R.F. (rfasan@ur.rochester.edu)*

**Table of contents:**

|                                 |               |
|---------------------------------|---------------|
| Supplementary Table S1-S2       | Pages S2-S3   |
| Supplementary Figure S1-S2      | Pages S4-S12  |
| Experimental Procedures         | Pages S13-S16 |
| Compound Characterization Data  | Page S17-S21  |
| X-ray crystallographic analyses | Page S22-S23  |
| NMR spectra                     | Page S24-S35  |

**Table S1.** Diastereo- and enantioselectivity of Mb variants in whole-cell cyclopropanation of *p*-methoxystyrene in the presence of EDA or *ex situ* generated DTE. The absolute difference for the % *de* and % *ee* values measured with the two different carbene donors is also indicated. The graph in **Figure 3A** was generated by plotting the % *ee* values with EDA vs % *ee* value with DTE and by fitting the data with a linear regression model.

| Mb Variant                          | <i>p</i> -methoxy-styrene + EDA <sup>a</sup> |                                       | <i>p</i> -methoxy-styrene + DTE <sup>b</sup> |                                       | Δ(% <i>de</i> ) | Δ(% <i>ee</i> ) |
|-------------------------------------|----------------------------------------------|---------------------------------------|----------------------------------------------|---------------------------------------|-----------------|-----------------|
|                                     | % <i>de</i> (trans)                          | % <i>ee</i> (1 <i>S</i> ,2 <i>S</i> ) | % <i>de</i> (trans)                          | % <i>ee</i> (1 <i>S</i> ,2 <i>S</i> ) |                 |                 |
| WT                                  | 79                                           | 13                                    | 70                                           | 4                                     | 9               | 9               |
| Mb(H64V)                            | 91                                           | 26                                    | >99                                          | 65                                    | 8               | 39              |
| Mb(V68A)                            | 97                                           | 86                                    | >99                                          | 98                                    | 2               | 12              |
| Mb(H64V,V68A)                       | >99                                          | 99                                    | >99                                          | 99.5                                  | 0               | 0.5             |
| Mb(H64V,V68S)                       | 98                                           | 84                                    | 97                                           | 83                                    | 1               | 1               |
| Mb(H64V,V68G)                       | 93                                           | 99                                    | >99                                          | 98                                    | 6               | 1               |
| Mb(H64V,I107W)                      | 93                                           | 77                                    | 93                                           | 30                                    | 0               | 47              |
| Mb(H64V,V68F,L29S)<br>(= RR1)       | 89                                           | -64                                   | 90                                           | -63                                   | 1               | 1               |
| Mb(H64V,V68L,L29T)<br>(= RR2)       | 96                                           | -57                                   | 98                                           | -91                                   | 2               | 34              |
| Mb(H64V,V68F,L29T)<br>(= RR3)       | 97                                           | -26                                   | 92                                           | -39                                   | 5               | 13              |
| Mb(H64V,V68F,L29T,I107L)<br>(= RR4) | 96                                           | -73                                   | 94                                           | -65                                   | 2               | 8               |
| Mb(H64V,V68F,L29T,F43W)<br>(= RR5)  | 89                                           | -31                                   | 93                                           | -38                                   | 4               | 7               |

<sup>a</sup> Reaction conditions: 400 μL scale reactions using 10 mM 4-methoxy-styrene (**9a**), 20 mM ethyl diazoacetate (EDA), and 380 μL *E. coli* (C41(DE3)) cells (OD<sub>600</sub> = 40) expressing the indicated Mb variant in phosphate buffer (pH 7.2), room temp., 16 hours.

<sup>b</sup> Reaction conditions: 10 mL scale using 10 mM 4-methoxy-styrene (**9a**), 4 equiv. trifluoroethylamine (**5**) and 9.5 mL *E. coli* (C41(DE3)) cells (OD<sub>600</sub> = 40) expressing the indicated Mb variant in phosphate buffer (pH 7.2), room temp., 16 hours.

**Table S2.** Diastereo- and enantioselectivity of *trans*-(1*R*,2*R*)-selective Mb variant RR2 (and RR4) for cyclopropanation of aryl-substituted olefins in the presence of *ex situ* generated DTE. Reactions were carried out on a 10 mL scale using Mb(H64V,V68L,L29T)-expressing *E. coli* (C41(DE3)) cells (OD<sub>600</sub> = 40), 7.5 mM olefin, 4 equiv. trifluoroethylamine (**5**) in phosphate buffer (pH 7.2), room temp., 2.5 hours. <sup>a</sup> using OD<sub>600</sub> = 80. <sup>b</sup> using 15 mM substrate. <sup>c</sup> using 12 equiv. trifluoroethylamine (**5**). <sup>d</sup> 5 hours.

| Entry            | Substrate                                                                                         | Product                                                                                           | Mb variant                                                       | % <i>de</i><br>( <i>trans</i> ) | % <i>ee</i><br>(1 <i>R</i> ,2 <i>R</i> ) |
|------------------|---------------------------------------------------------------------------------------------------|---------------------------------------------------------------------------------------------------|------------------------------------------------------------------|---------------------------------|------------------------------------------|
| 1                | 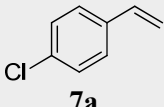<br><b>7a</b>    | <br><b>7c</b>    | Mb(H64V,V68L,L29T) =<br>RR2                                      | 99.9                            | 83                                       |
| 2                | <br><b>8a</b>    | <br><b>8c</b>    | Mb(H64V,V68L,L29T) =<br>RR2                                      | 99.9                            | 80                                       |
| 3                | <br><b>9a</b>   | <br><b>9c</b>   | Mb(H64V,V68L,L29T) =<br>RR2                                      | 98                              | 91                                       |
| 4                | <br><b>10a</b> | <br><b>10c</b> | Mb(H64V,V68L,L29T) =<br>RR2                                      | 99.9                            | 65                                       |
| 5 <sup>a,b</sup> | <br><b>11a</b> | <br><b>11c</b> | Mb(H64V,V68L,L29T) =<br>RR2                                      | 99.9                            | 85                                       |
| 6 <sup>a,b</sup> | <br><b>12a</b> | <br><b>12c</b> | Mb(H64V,V68L,L29T) =<br>RR2                                      | 99.9                            | 88                                       |
| 7 <sup>a,c</sup> | <br><b>13a</b> | <br><b>13c</b> | Mb(H64V,V68L,L29T) =<br>RR2<br>Mb(H64V,V68L,L29T,I107L) =<br>RR4 | 99.9<br>99.9                    | 21<br>58                                 |
| 8 <sup>a,c</sup> | <br><b>14a</b> | <br><b>14c</b> | Mb(H64V,V68L,L29T) =<br>RR2                                      | 99.9                            | 92                                       |

**Figure S1.** Impact of Val68 mutations on active site configuration in myoglobin. (a) Ribbon representation of wild-type sperm whale myoglobin (pdb 1A6K) ; (b) close-up view of the heme distal pocket, showing the heme cofactor (tan) and amino acid residues defining the active site (orange) as stick models; (c) top views of the heme pocket in wild-type myoglobin (*left*) and models of this protein after substitution of Val68 with alanine (*middle*) or glycine (*right*). The latter highlight the cavity created by the V68A/G mutations (yellow) in proximity of pyrrole atom N2 (labeled) of the heme group, which is proposed to favor orientation of the heme-bound trifluoromethylcarbene group as depicted in **Figure 2A**.

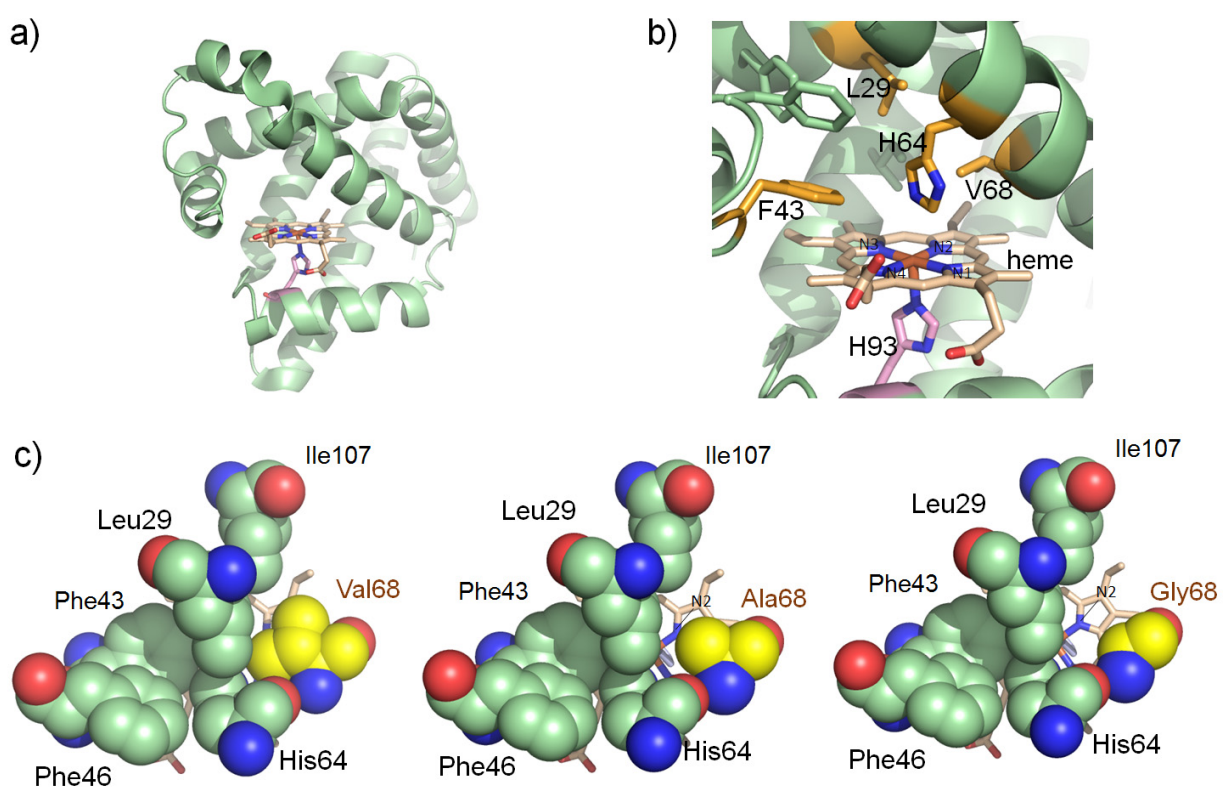

**Figure S2.** Chiral GC and SFC chromatograms for determination of enantiomeric excess in the cyclopropanation reactions catalyzed by the Mb variants. Reference racemic samples were prepared using Fe(III)(TPP)Cl catalyst as described in the experimental procedures.

(a) Reaction with 4-chloro-styrene (**7a**) and DTE to give **7b-c**:

i. Chiral GC analysis of Fe(III)(TPP)Cl-catalyzed reaction:

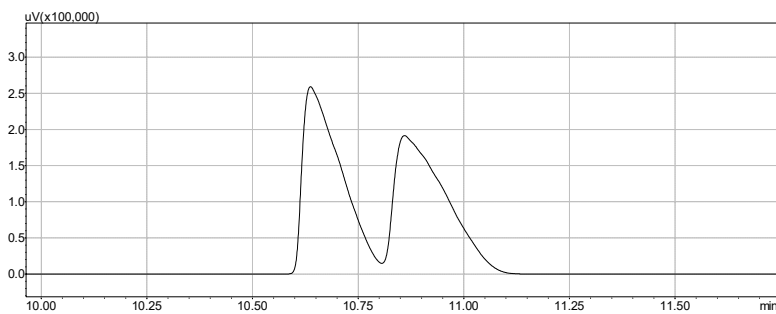

ii. Chiral GC analysis of Mb(H64V,V68A)-catalyzed reaction:

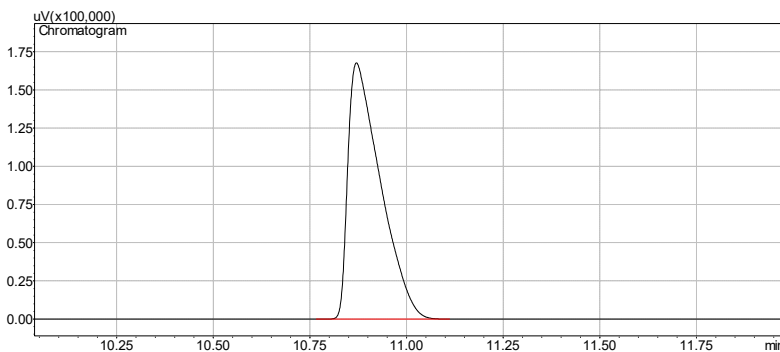

iii. Chiral GC analysis of RR2 (=Mb(H64V,V68L,L29T))-catalyzed reaction:

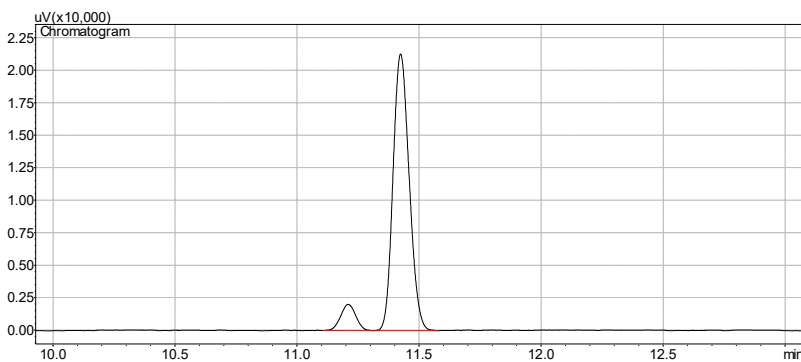

(b) Reaction with 4-bromo-styrene (**8a**) and DTE to give **8b-c**:

i. Chiral GC analysis of Fe(III)(TPP)Cl-catalyzed reaction:

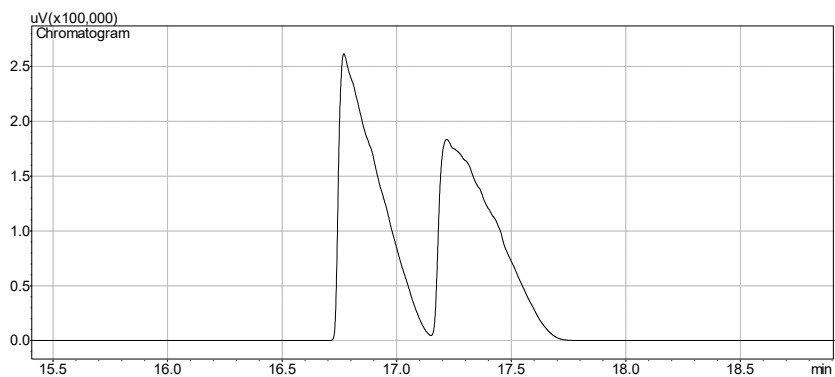

ii. Chiral GC analysis of Mb(H64V,V68A)-catalyzed reaction:

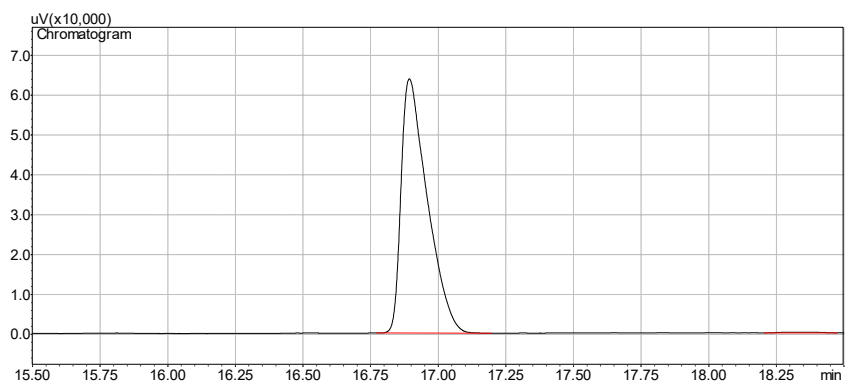

iii. Chiral GC analysis of RR2-catalyzed reaction:

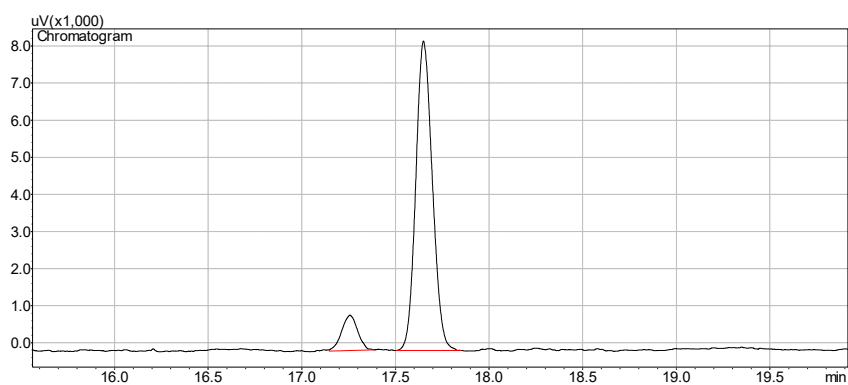

(c) Reaction with 4-methoxy-styrene (**9a**) and DTE to give **9b-c**:

i. Chiral GC analysis of Fe(III)(TPP)Cl-catalyzed reaction:

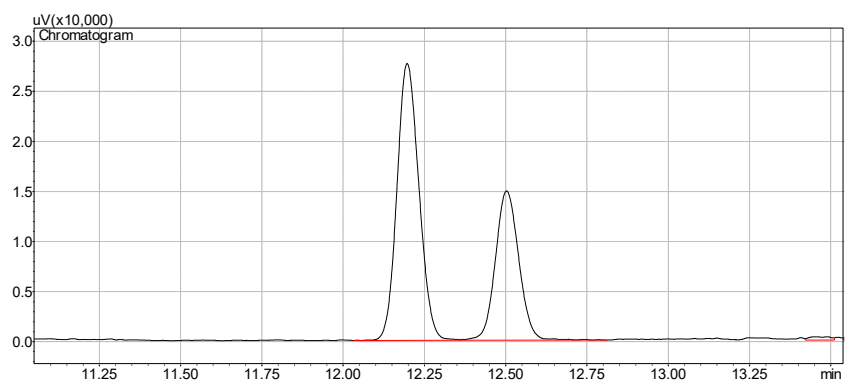

ii. Chiral GC analysis of Mb(H64V,V68A)-catalyzed reaction:

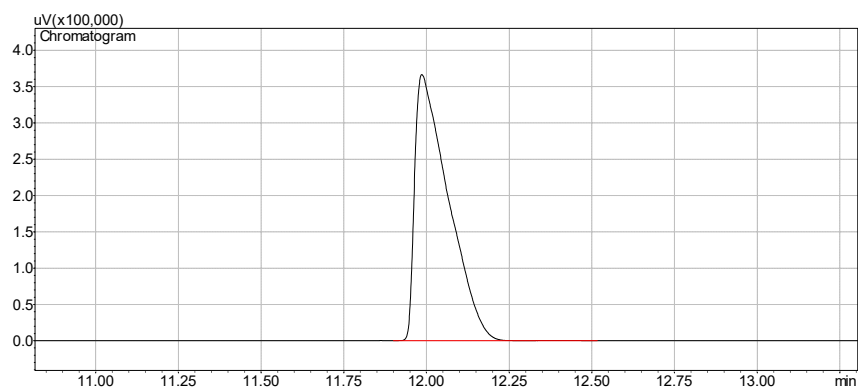

iii. Chiral GC analysis of RR2-catalyzed reaction:

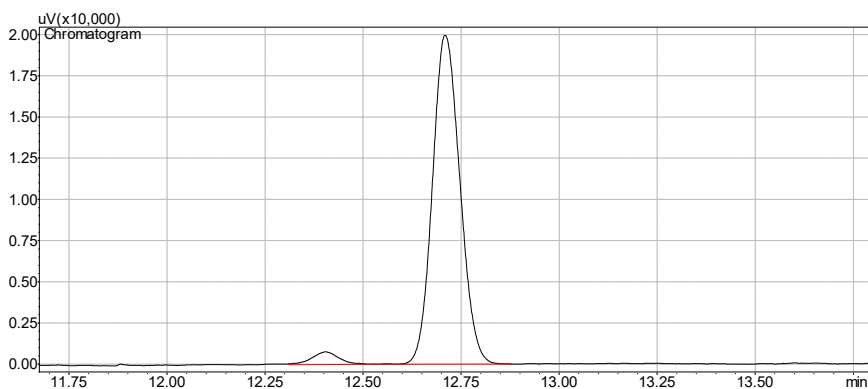

(d) Reaction with 4-nitro-styrene (**10a**) and DTE to give **10b-c**:

i. Chiral GC analysis of Fe(III)(TPP)Cl-catalyzed reaction:

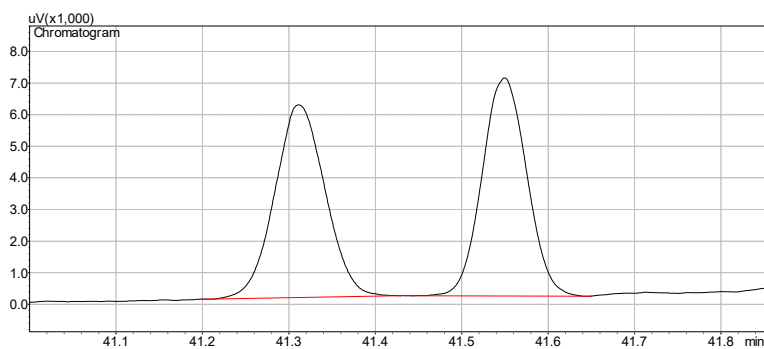

ii. Chiral GC analysis of Mb(H64V,V68A)-catalyzed reaction:

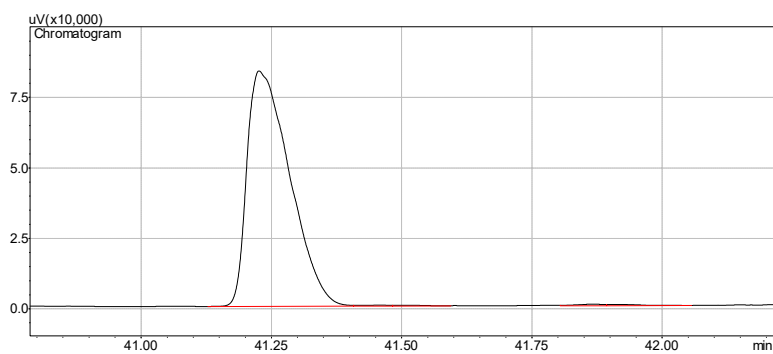

iii. Chiral GC analysis of RR2-catalyzed reaction:

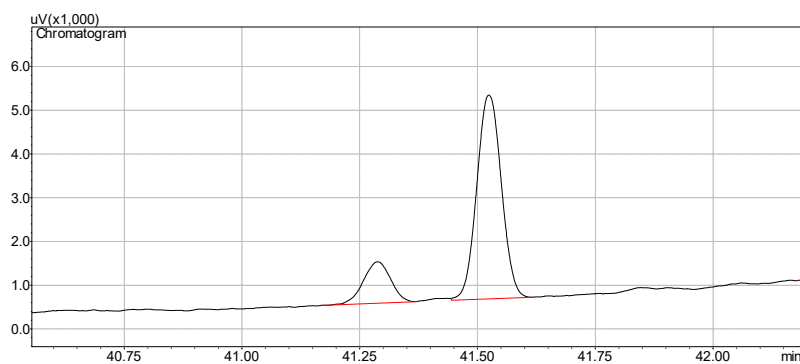



(e) Reaction with 4-methyl-styrene (**11a**) and DTE to give **11b-c**:

i. Chiral GC analysis of Fe(III)(TPP)Cl-catalyzed reaction:

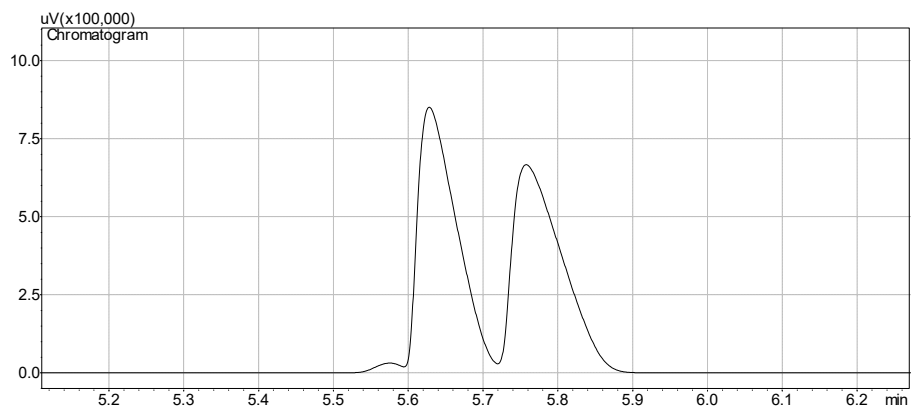

ii. Chiral GC analysis of Mb(H64V,V68G)-catalyzed reaction:

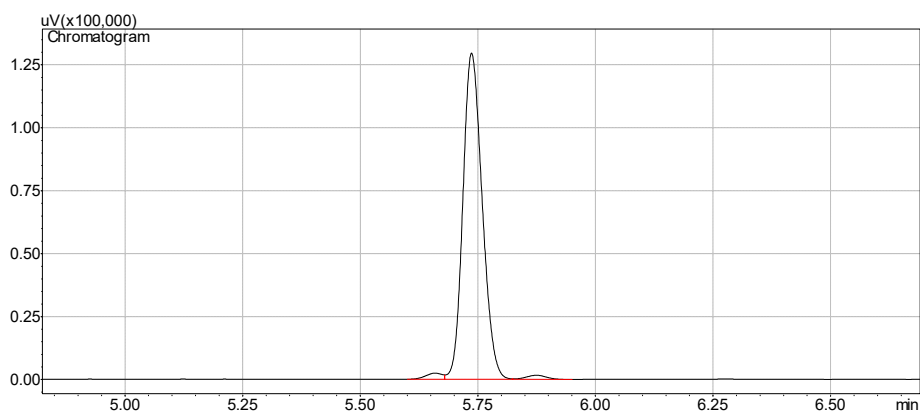

iii. Chiral GC analysis of RR2-catalyzed reaction:

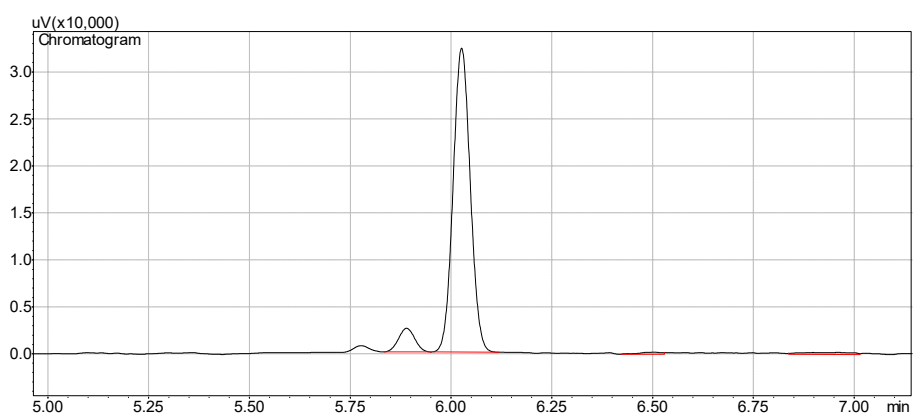

(f) Reaction with 3-methyl-styrene (**12a**) and DTE to give **12b-c**:

i. Chiral GC analysis of Fe(III)(TPP)Cl-catalyzed reaction:

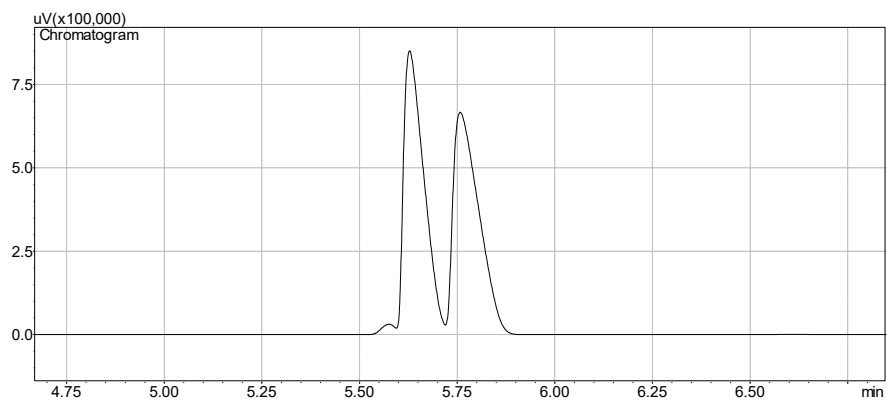

ii. Chiral GC analysis of Mb(H64V,V68G)-catalyzed reaction:

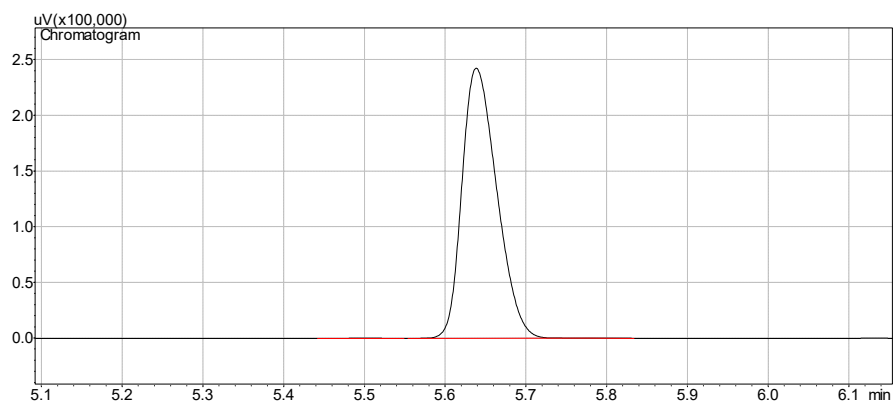

iii. Chiral GC analysis of RR2-catalyzed reaction:

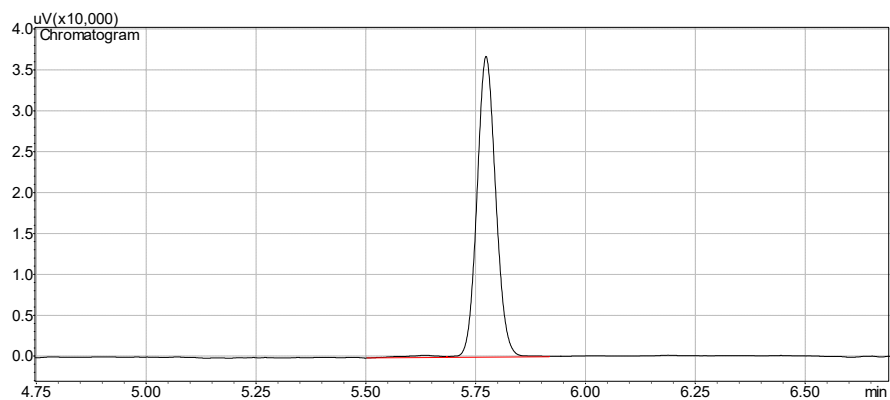

(g) Reaction with 1-vinyl-naphtalene (**13a**) and DTE to give **13b-c**:

i. Chiral SFC analysis of Fe(III)(TPP)Cl-catalyzed reaction:

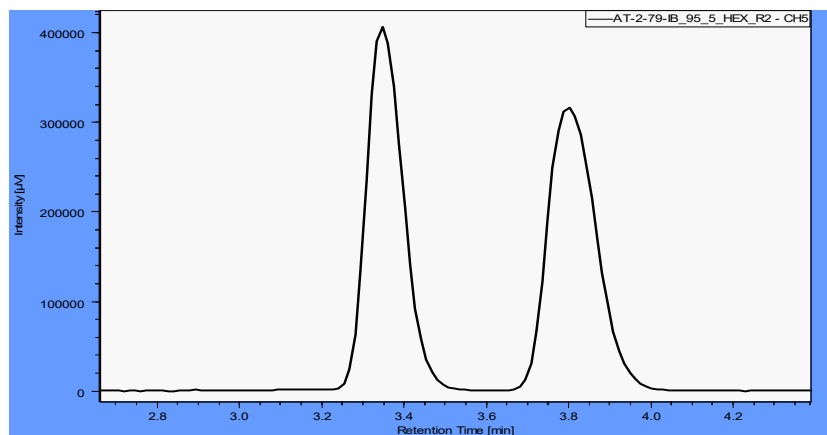

ii. Chiral SFC analysis of Mb(H64V,V68A)-catalyzed reaction:

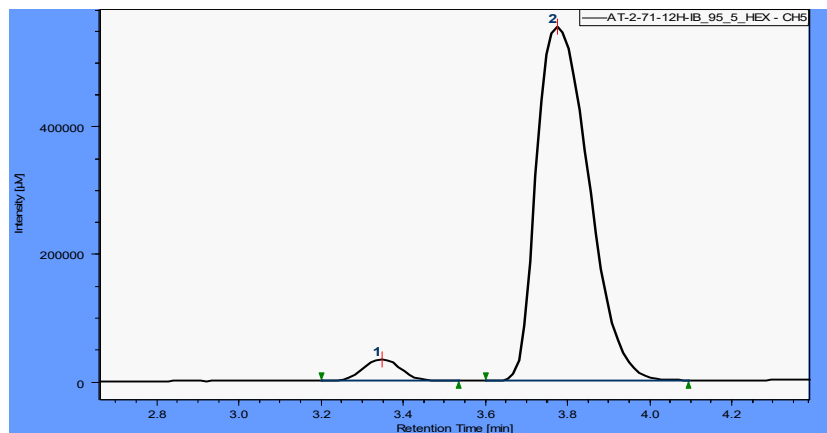

iii. Chiral SFC analysis of RR4-catalyzed reaction:

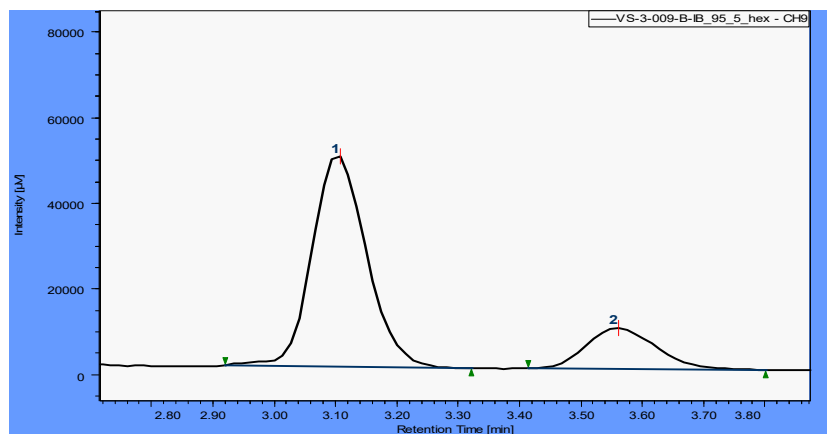

(h) Reaction with 3-(prop-1-en-2-yl)thiophene (**14a**) and DTE to give **14b-c**:

i. Fe(III)(TPP)Cl-catalyzed reaction:

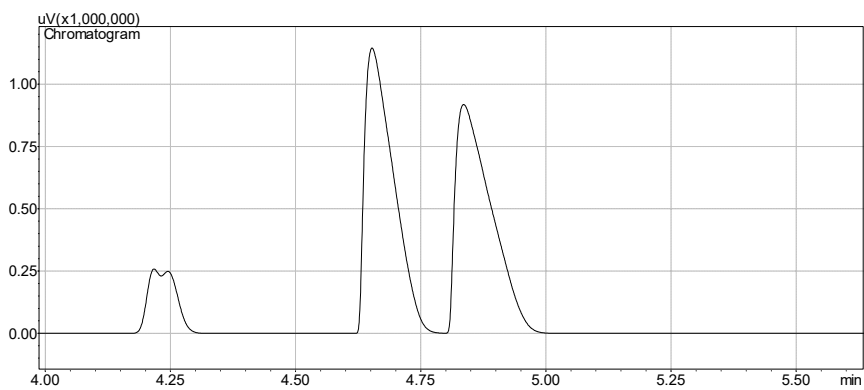

ii. Mb(H64V,V68A)-catalyzed reaction:

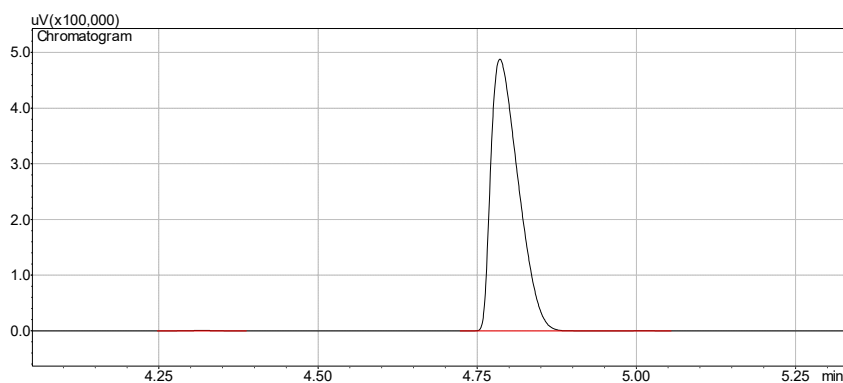

iii. RR2 (=Mb(H64V,V68L,L29T))-catalyzed reaction:

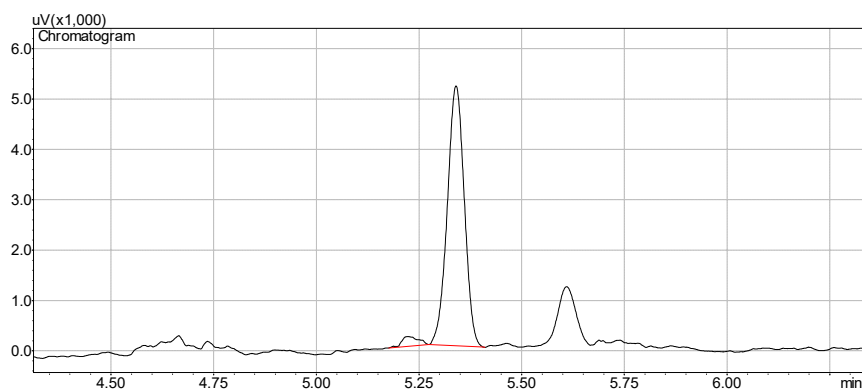

## Experimental Procedures

### General Information

All chemicals and reagents were purchased from commercial suppliers (Sigma-Aldrich, ACS Scientific, Alfa Aesar, J.T. Baker) and used without any further purification, unless otherwise stated. All reactions were carried out under argon pressure in oven-dried glassware with magnetic stirring using standard gas-tight syringes, cannulae, and septa.  $^1\text{H}$ ,  $^{13}\text{C}$ , and  $^{19}\text{F}$  NMR spectra were measured on a Bruker DPX-400 instrument (operating at 400 MHz for  $^1\text{H}$ , 100 MHz for  $^{13}\text{C}$ , and 375 MHz for  $^{19}\text{F}$ ) or a Bruker DPX-500 instrument (operating at 500 MHz for  $^1\text{H}$  and 125 MHz for  $^{13}\text{C}$ ). Tetramethylsilane (TMS) served as the internal standard (0 ppm) for  $^1\text{H}$  NMR,  $\text{CDCl}_3$  was used as the internal standard (77.0 ppm) for  $^{13}\text{C}$  NMR, and trifluorotoluene served as the internal standard (0 ppm) for  $^{19}\text{F}$  NMR. Column chromatography purification was carried out using AMD Silica Gel 60 Å 230-400 mesh. Thin Layer Chromatography (TLC) was carried out using Merck Millipore TLC silica gel 60 F254 glass plates.

### Protein Expression

Cloning of the Mb variants investigated in this work was described previously (Bordeaux *et al.*, *Angew. Chem. Int. Ed.* **2015**, *54*, 1744; Bajaj *et al.*, *Angew. Chem. Int. Ed.* **2016**, *55*, 16110). The Mb variants were expressed in *E. coli* BL21(DE3) or *E. coli* C41(DE3) cells as follows. After transformation, cells were grown in TB medium (ampicillin, 100 mg L<sup>-1</sup>) at 37 °C (200 rpm) until OD<sub>600</sub> reached 0.6. Cells were then induced with 0.25 mM isopropyl- $\beta$ -D-1-thiogalactopyranoside (IPTG) and 0.3 mM  $\delta$ -aminolevulinic acid (ALA). After induction, cultures were shaken at 180 rpm and 27 °C and harvested after 20 h by centrifugation at 4,000 rpm at 4 °C. Myoglobin concentration was determined after cell lysis by sonication, followed by CO-binding assay using an extinction coefficient  $\epsilon_{415} = 187 \text{ mM}^{-1}\text{cm}^{-1}$ .

### Synthetic Procedures

Alkenes **7a-13b** were purchased from chemical suppliers and used without further purification. Alkene **14a** was synthesized as described previously.<sup>2</sup> Racemic standards for the stereoisomer analyses of the cyclopropane products **7b-14b** were prepared via cyclopropanation with Fe(III)TPPCL catalyst according to the general **Procedure A** provided below, which is based

on a published method by Morandi & Carreira (*Angew. Chem. Int. Ed.* **2010**, *49*, 938). Enantioenriched Mb-catalyzed cyclopropanation products were synthesized following **Procedure B**, and were used as authentic standards for the construction of calibration curves.

### **Chemical Synthesis of Racemic Standards for Cyclopropanation Products (Procedure A)**

To a round bottom flask was added Fe(TPP)Cl (0.0066 mmol), 4-dimethylamino pyridine (DMAP) (0.022 mmol), sodium acetate (0.044 mmol), and trifluoroethylamine hydrochloride (0.33 mmol). Degassed distilled water (1 mL) and H<sub>2</sub>SO<sub>4</sub> (1.2 μL, 0.022 mmol) were added, and the solution was degassed for one minute by sparging with argon. The alkene (0.22 mmol) was subsequently added, and a NaNO<sub>2</sub> solution (27 mg, 0.399 mmol, in 1 mL of degassed, distilled water) was added via syringe pump over 10 hours. After additional 4 hours, CH<sub>2</sub>Cl<sub>2</sub> and water were added, and the aqueous phase was extracted with CH<sub>2</sub>Cl<sub>2</sub> three times. The organic layer was collected, dried with MgSO<sub>4</sub>, and concentrated under reduced pressure. Analysis of the products was performed by filtering the crude reaction mixture through a plug of silica and eluting with pentanes for chiral GC analysis. The cyclopropanation products consist of a racemic mixture of *trans*-(*S,S*) and *trans*-(*R,R*) isomers.

### **Whole-cell Cyclopropanation Reactions with *ex situ* generated DTE (Procedure B)**

Whole-cell experiments were carried out at a 20 mL-scale using 19 mL of *E. coli* cells expressing Mb(H64V,V68A), 7.5 mM alkene, and 5 equivalents of EDA or DTE. In a typical procedure, alkene (0.15 mmol alkene in 1 mL of ethanol) was added slowly to a 125 mL Erlenmeyer flask containing a suspension of Mb(H64V,V68A)-expressing cells (OD<sub>600</sub> = 40 in KPi, pH 7.2) under argon pressure, equipped with a magnetic stir bar and sealed with a rubber septum. The mixture was stirred at room temperature under argon pressure. In a 25 mL round-bottom flask containing a magnetic stir bar, either glycine ethyl ester hydrochloride or 2,2,2-trifluoroethylamine hydrochloride (0.75 mmol), sodium acetate (0.10 mmol), 4-dimethylaminopyridine (DMAP) (0.05 mmol) were added and dissolved in degassed, deionized water (8.00 mL). Then, sulfuric acid (0.05 mmol) was added and the solution was degassed for one minute by sparging with argon. A solution of sodium nitrite (0.90 mmol) in degassed, deionized water (4 mL) was added by syringe pump over 3-4 hours at room temperature. The generated diazo reagent (EDA or TDE) was gradually bubbled into the alkene and whole cell

reaction mixture using a continuous flow of argon. The reaction mixture was stirred for 4-12 hours at room temperature under anaerobic conditions. The TON for the whole-cell reactions were calculated based on Mb concentration in the reaction mixture as measured via UV-vis spectroscopy ( $\epsilon_{415} = 187 \text{ mM}^{-1}\text{cm}^{-1}$ ) after cell lysis. The reaction mixture was extracted using diethyl ether (20 mL x 3) in 50-mL Falcon tubes. The tubes were shaken for 3 min manually, followed by additional vortexing for 3 min, and centrifugation (4,000 rpm, 15 min). The combined organic layers were dried over sodium sulfate and concentrated under reduced pressure in an ice-cold water bath. The crude product was purified via column chromatography using silica gel and 0-5% diethyl ether/pentanes as the eluent, keeping fractions on ice to prevent evaporation of the volatile products. Solvent was then removed by rotary evaporation using an ice-cold water bath to afford the desired product, which was characterized by GC-MS,  $^1\text{H-NMR}$ ,  $^{13}\text{C-NMR}$ , and  $^{19}\text{F-NMR}$ .

### Product Analysis

The reactions were analyzed by adding 20  $\mu\text{L}$  of internal standard (benzodioxole, 100 mM in methanol) to a 400  $\mu\text{L}$  aliquot of the whole-cell reaction mixture, followed by extraction with 400  $\mu\text{L}$  of dichloromethane (DCM) and centrifugation at 14,000 rpm. The organic layer was collected and analyzed by GC-FID (see **Analytical Methods** section for details on GC analyses). Calibration curves for the different cyclopropane products were constructed using pure products isolated from the whole-cell cyclopropanation reactions as references (see **Synthetic Procedures**). All measurements were performed at least in duplicate. For stereoselectivity determination, the samples were analyzed by GC-FID or SFC using a chiral column as described below.

### Analytical Methods

Gas chromatography (GC) analyses were carried out using a Shimadzu GC-2010 gas chromatograph equipped with a FID detector, and a Cyclosil-B column (30 m x 0.25 mm x 0.25  $\mu\text{m}$  film). The following GC method was used for TON analysis and stereoisomer separation for **7b-c** through **12b-c** and **14b-c**: 1  $\mu\text{L}$  injection, injector temp.: 200  $^\circ\text{C}$ , detector temp: 300  $^\circ\text{C}$ . Gradient: column temperature set at 120 $^\circ\text{C}$  for 3 min, then to 150  $^\circ\text{C}$  at 0.8  $^\circ\text{C}/\text{min}$ , then to 245  $^\circ\text{C}$  at 25  $^\circ\text{C}/\text{min}$ . Total run time was 46.30 min.

| Product        | t <sub>R</sub> for ( <i>IS,2S</i> ) isomer (min) | t <sub>R</sub> for ( <i>IR,2R</i> ) isomer (min) |
|----------------|--------------------------------------------------|--------------------------------------------------|
| <b>7b/7c</b>   | 10.64                                            | 10.86                                            |
| <b>8b/8c</b>   | 16.77                                            | 17.22                                            |
| <b>9b/9c</b>   | 12.20                                            | 12.50                                            |
| <b>10b/10c</b> | 41.31                                            | 41.55                                            |
| <b>11b/11c</b> | 5.63                                             | 5.76                                             |
| <b>12b/12c</b> | 5.62                                             | 5.76                                             |
| <b>14b/14c</b> | 4.65                                             | 4.84                                             |

Stereoisomer resolution for compounds **13b-c** was performed by Supercritical Fluid Chromatography (SFC) analysis, using a JASCO Analytical and Semi-Preparative SFC instrument equipped with a column oven (35 °C), photodiode array detector, a backpressure regulator (12.0 MPa), a carbon dioxide pump and a sample injection volume of 3  $\mu$ L. Daicel Chiralpak IA, IB or IC column (0.46 cm ID  $\times$  25 cm L) were used for separation of enantiomers. All samples were eluted using an isocratic solvent system with the indicated modifier (see table below) in liquid CO<sub>2</sub> at an elution rate of 4 mL/min and detected at  $\lambda = 220$  nm. Total run time was 10.2 min.

| Product        | Column | Modifier<br>Solvent | t <sub>R</sub> for ( <i>IS,2S</i> )<br>isomer (min) | t <sub>R</sub> for ( <i>IR,2R</i> )<br>isomer (min) |
|----------------|--------|---------------------|-----------------------------------------------------|-----------------------------------------------------|
| <b>13b/13c</b> | IB     | Hexanes             | 3.77                                                | 3.35                                                |

### Preparative Scale Cyclopropanation Reaction with *ex situ* Generated DTE (Procedure C)

A preparative scale experiment was carried out using 39 mL of *E. coli* cells expressing Mb(H64V,V68A), 30 mM alkene, and 10 equivalents of DTE. Alkene (0.600 mmol 4-methoxy styrene in 1 mL of ethanol) was added slowly to a 125 mL Erlenmeyer flask containing 39 mL of resuspended Mb(H64V,V68A)-expressing cells (OD<sub>600</sub> = 80 in KPi, pH 7.2) under argon pressure, equipped with a magnetic stir bar and sealed with a rubber septum. The mixture was stirred at room temperature under argon pressure. A second 125 mL Erlenmeyer flask containing 20 mL of cell suspension and a magnetic stir bar was connected in tandem to the reaction flask. In a 50 mL round-bottom flask containing a magnetic stir bar, 2,2,2-trifluoroethylamine hydrochloride (6.00 mmol), sodium acetate (0.798 mmol), 4-dimethylaminopyridine (DMAP) (0.402 mmol) were



added and dissolved in degassed, deionized water (12.00 mL). Then, sulfuric acid (0.402 mmol) was added and the solution was degassed for one minute by sparging with argon. A solution of (7.20 mmol) sodium nitrite in degassed, deionized water (8 mL) was added by syringe pump over 4 hours at room temperature. The generated DTE was gradually bubbled into the alkene and whole cell reaction mixture using a continuous flow of argon. The reaction mixture was stirred for 5 hours at room temperature under anaerobic conditions. Reaction mixtures from both flasks were combined and extracted with dichloromethane (20 mL x 3). The organic layers were combined and dried over sodium sulfate. Dichloromethane was removed by distillation using a Liebig condenser at 50 °C. The concentrated crude product was transferred to a 250 mL round-bottom flask and a magnetic stir bar was added. Anhydrous dichloromethane (20 mL) was added and the mixture was allowed to stir at 0 °C. Then, *meta*-chloroperoxybenzoic acid (mCPBA) (0.1151 g, 0.667 mmol) was added and the reaction mixture was stirred overnight. After 12 h, residual alkene was consumed, as verified by TLC (1% diethyl ether/pentanes, visualized with CAN stain). The reaction mixture was washed with 5% aqueous KOH (20 mL) and extracted with dichloromethane (15 mL x 3). Dichloromethane was removed by distillation and the product was purified via flash column chromatography using silica and 5% diethyl ether/pentanes to afford the cyclopropanation product as a clear, colorless oil (98.0 mg, 76% isolated yield, >99.9 *de*<sub>trans</sub>, >99.9 *ee*<sub>(1*S*,2*S*)</sub>).

## Compound Characterization Data

### 1-Chloro-4-(2-(trifluoromethyl)cyclopropyl)benzene (7b):

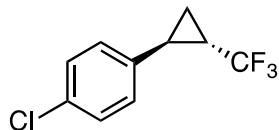

Following standard procedure **B**, except an additional 125 mL Erlenmeyer flask containing 20 mL of cell suspension was connected in tandem to the alkene and whole-cell reaction flask. Enantioenriched *trans* isomer 1-chloro-4-(2-(trifluoromethyl) cyclopropyl) benzene was isolated via column chromatography using silica and 100% pentanes to afford the product as a colorless oil, 67% yield. GC-MS *m/z* (% relative intensity): 222(13.4), 220(40.3), 185(100), 165(67.8), 151(47.6), 116(64.8), 115(82.9); <sup>1</sup>H-NMR (500 MHz, CDCl<sub>3</sub>): δ 7.24 (d, *J* = 8.5 Hz, 2H), 7.03 (d, *J* = 8.5 Hz, 2H), 2.32 (dt, *J* = 10.0, 5.4 Hz, 1H), 1.77-1.70 (m, 1H), 1.37 (dt, 10.9, 5.6 Hz, 1H), 1.12-1.09 (m, 1H); <sup>13</sup>C NMR (CDCl<sub>3</sub>, 100 MHz): δ 137.5, 132.6, 128.7, 127.9, 124.6, 23.4 (q, *J* = 37 Hz), 19.1, 10.8 (d, *J* = 2 Hz); <sup>19</sup>F NMR (375 MHz, CDCl<sub>3</sub>): δ -4.5 (d, *J* = 2 Hz).

### 1-Bromo-4-(2-(trifluoromethyl)cyclopropyl)benzene (8b)

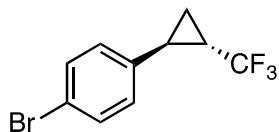

Following standard procedure **B**, except Mb(H64V,V68A)-expressing cells diluted to OD<sub>600</sub> = 80 (KPi, pH 7.2) were used and an additional 125 mL Erlenmeyer flask containing 20 mL of cell suspension was connected in tandem to the alkene and whole-cell reaction flask. Enantioenriched *trans* isomer 1-bromo-4-(2-(trifluoromethyl)cyclopropyl)benzene was isolated via column chromatography using silica and 100% pentanes to afford the product as a colorless oil, 68% yield. GC-MS *m/z* (% relative intensity): 266(39.2), 264(41.6), 185(65.8), 165(62.0), 116(100), 115(63.6); <sup>1</sup>H-NMR (500 MHz, CDCl<sub>3</sub>): δ 7.39 (d, *J* = 8.5 Hz, 2H), 6.97 (d, *J* = 8.4 Hz, 2H), 2.30 (dt, *J* = 10.1, 5.5 Hz, 1H), 1.77-1.70 (m, 1H), 1.37 (dt, *J* = 9.8, 5.7 Hz, 1H), 1.13-1.09 (m, 1H); <sup>13</sup>C-NMR (125 MHz, CDCl<sub>3</sub>): δ 138.0, 131.7, 128.3, 124.6, 120.5, 23.4 (q, *J* = 37 Hz), 19.1 (d, *J* = 2 Hz), 10.8 (d, *J* = 2 Hz); <sup>19</sup>F NMR (375 MHz, CDCl<sub>3</sub>): δ -4.5 (d, *J* = 2 Hz).

### 1-Methoxy-4-(2-(trifluoromethyl)cyclopropyl)benzene (9b):

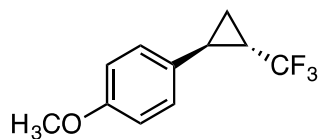

Following standard procedure **C**, enantioenriched *trans* isomer 1-methoxy-4-(2-(trifluoromethyl)cyclopropyl)benzene was isolated via flash column chromatography using silica and 5% diethyl ether in pentanes to afford the product as a colorless oil, 76% yield. GC-MS *m/z* (% relative intensity): 216(100), 215(45.4), 185(12.6), 147(70.5), 115(20.4); <sup>1</sup>H-NMR (500 MHz, CDCl<sub>3</sub>): δ 7.08 (d, *J* = 10.6 Hz, 2H), 6.86 (d, *J* = 10.5 Hz, 2H), 3.80 (s, 3H), 2.35 (dt, *J* = 16.0, 8.5 Hz, 1H), 1.76-1.70 (m, 1H), 1.35 (dt, *J* = 13.0, 6.5 Hz, 1H), 1.14-1.05 (m, 1H); <sup>13</sup>C NMR (CDCl<sub>3</sub>, 125 MHz): δ 158.5, 131.0, 127.4 (q, *J* = 338 Hz), 114.0, 53.3, 29.7, 23.0 (q, *J* = 36), 18.9, 10.4; <sup>19</sup>F NMR (375 MHz, CDCl<sub>3</sub>): δ -4.4 (d, *J* = 6.8 Hz).

### 1-Nitro-4-(2-(trifluoromethyl)cyclopropyl)benzene (10b)

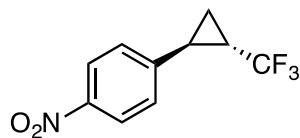

Following procedure **B**, enantioenriched *trans* isomer 1-nitro-4-(2-(trifluoromethyl)cyclopropyl)benzene was isolated via column chromatography using silica gel and 5% diethyl ether in pentanes to afford the product as a white crystalline solid, 43% yield. GC-MS *m/z* (% relative intensity): 231(80.5), 201(32.5), 165(43.3), 164(43.6), 145(34.4), 116(68.9), 115(100); <sup>1</sup>H-NMR (500 MHz, CDCl<sub>3</sub>): δ 8.14 (d, *J* = 8.5 Hz, 2H), 7.22 (d, *J* = 8.6 Hz, 2H), 2.42 (dt, *J* = 15.0, 5.5 Hz, 1H), 1.92 (m, 1H), 1.50 (dt, *J* = 12.0, 5.9 Hz, 1H), 1.29 (m, 1H); <sup>13</sup>C NMR (CDCl<sub>3</sub>, 125 MHz): δ 146.9 (d, *J* = 55 Hz), 127.1, 126.4, 124.2, 123.8, 58.3, 24.3 (q, *J* = 37 Hz), 19.5 (d, *J* = 3 Hz), 18.4, 11.8 (d, *J* = 2 Hz); <sup>19</sup>F NMR (375 MHz, CDCl<sub>3</sub>): δ -4.4 (d, *J* = 6.8 Hz).

### 1-Methyl-4-(2-(trifluoromethyl)cyclopropyl)benzene (11b)

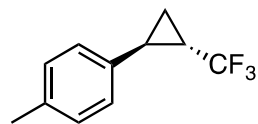

Following procedure **B**, except Mb(H64V,V68G)-expressing cells (OD<sub>600</sub> = 80 in KPi, pH 7.2) were used and an additional 125 mL Erlenmeyer flask containing 20 mL of cell suspension was

connected in tandem to the alkene and whole-cell reaction flask. Enantioenriched *trans* isomer 1-methyl-4-(2-(trifluoromethyl)cyclopropyl)benzene was isolated via column chromatography using silica gel and 100% pentanes to afford the product as a colorless oil, 78% yield. GC-MS *m/z* (% relative intensity): 200(77.3), 185(58.2), 165(33.1), 131(100), 116(30.5), 115(38.3), 91(27.1); <sup>1</sup>H-NMR (500 MHz, CDCl<sub>3</sub>): δ 7.08 (d, *J* = 8.0 Hz, 2H), 6.99 (d, *J* = 7.5, 2H), 2.31 (m, 4H), 1.76 (m, 1H), 1.32 (dt, *J* = 15.0, 5.5 Hz, 1H), 1.12-1.08 (m, 1H); <sup>13</sup>C NMR (CDCl<sub>3</sub>, 125 MHz): δ 136.4, 136.0, 129.3, 126.4, 124.9, 23.2 (q, *J* = 36 Hz), 21.0, 19.2, 10.7 (d, *J* = 2.1); <sup>19</sup>F NMR (375 MHz, CDCl<sub>3</sub>): δ -4.3 (d, *J* = 6.4 Hz).

### 1-Methyl-3-(2-(trifluoromethyl)cyclopropyl)benzene (12b)

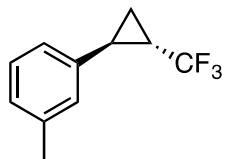

Following procedure **B**, except Mb(H64V,V68G)-expressing cells (OD<sub>600</sub> = 80 in KPi, pH 7.2) were used and an additional 125 mL Erlenmeyer flask containing 20 mL of cell suspension was connected in tandem to the alkene and whole-cell reaction flask. Enantioenriched *trans* isomer 1-methyl-3-(2-(trifluoromethyl)cyclopropyl)benzene was isolated via column chromatography using silica gel and 100% pentanes to afford the product as a colorless oil, 82% yield. GC-MS *m/z* (% relative intensity): 200(74.7), 185(47.2), 165(31.8), 131(100), 116(29.9), 115(36.9), 91(26.5); <sup>1</sup>H-NMR (500 MHz, CDCl<sub>3</sub>): δ 7.17-7.14 (t, *J* = 7.5 Hz, 1H), 7.01 (d, *J* = 7.5 Hz, 1H), 6.91 (s, 1H), 6.90-6.87 (m, 2H), 2.30 (m, 4H), 1.80 (m, 1H), 1.33 (dt, *J* = 15 Hz, 5 Hz, 1H), 1.14-1.10 (m, 1H); <sup>13</sup>C NMR (CDCl<sub>3</sub>, 125 MHz): δ 139.0, 138.3, 128.5, 127.5, 127.3, 127.0 123.4, 23.3 (q, 37 Hz), 21.4, 19.5, 10.8; <sup>19</sup>F NMR (375 MHz, CDCl<sub>3</sub>): δ -4.4 (d, *J* = 6.4 Hz).

### 1-(2-(Trifluoromethyl)cyclopropyl)naphthalene (13b)

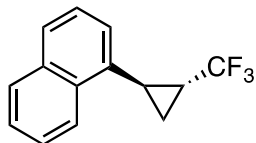

Following procedure **B**, except Mb(H64V,V68A)-expressing cells (OD<sub>600</sub> = 80 in KPi, pH 7.2) were used. Enantioenriched *trans* isomer 1-(2-(Trifluoromethyl)cyclopropyl) naphthalene was isolated via column chromatography using silica gel and 100% pentanes to afford the product as a

colorless oil, 58% yield. GC-MS  $m/z$  (% relative intensity): 236(86.4), 167(100), 165(57.0), 153(44.3), 152(49.9), 139(20.8);  $^1\text{H-NMR}$  (500 MHz,  $\text{CDCl}_3$ ):  $\delta$  8.29 (d,  $J = 8$  Hz, 1H), 7.86-7.75 (dd,  $J = 40, 8$  Hz, 2H), 7.59-7.49 (dt,  $J = 25, 7$  Hz, 2H), 7.40 (t,  $J = 7.2$  Hz, 1H), 7.27 (d,  $J = 6.9$  Hz, 1H), 2.82-2.77 (m, 1H), 1.86-1.80 (m, 1H), 1.52-1.47 (m, 1H), 1.32 (dt,  $J = 13.0, 6.3$  Hz, 1H);  $^{13}\text{C NMR}$  ( $\text{CDCl}_3$ , 125 MHz):  $\delta$  134.6, 133.6, 132.9, 128.6, 127.9, 127.5, 126.4, 126.0, 125.3, 124.5, 123.8, 21.0 (q,  $J = 73, 36$  Hz), 17.9 (d,  $J = 2$  Hz), 9.1 (d,  $J = 2$  Hz);  $^{19}\text{F NMR}$  (375 MHz,  $\text{CDCl}_3$ ):  $\delta$  -3.8 (d,  $J = 6.4$  Hz).

### 3-(1-Methyl-2-(trifluoromethyl)cyclopropyl)thiophene (14b)

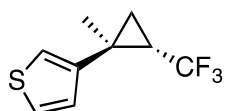

Following procedure **B**, except Mb(H64V,V68A)-expressing cells ( $\text{OD}_{600} = 80$  in KPi, pH 7.2) were used and an additional 125 mL Erlenmeyer flask containing 20 mL of cell suspension was connected in tandem to the alkene and whole-cell reaction flask. Enantioenriched *trans* isomer 3-(1-methyl-2-(trifluoromethyl)cyclopropyl)thiophene was isolated via column chromatography using silica gel and 100% pentanes to afford the product as a colorless oil, 71% yield. GC-MS  $m/z$  (% relative intensity): 206(86.8), 191(100), 137(63.1), 97(18.4);  $^1\text{H-NMR}$  (400 MHz,  $\text{CDCl}_3$ ):  $\delta$  7.22 (s, 2H), 6.97 (s, 1H), 6.87 (d,  $J = 4.9$  Hz, 1H), 1.78-1.68 (m, 1H), 1.53 (s, 3H), 1.33-1.31 (m, 1H), 1.22 (m, 1H);  $^{13}\text{C NMR}$  ( $\text{CDCl}_3$ , 100 MHz):  $\delta$  127.4, 126.2, 125.7, 119.8, 29.7, 27.4 (q,  $J = 51, 29$  Hz), 18.9, 18.1 (d,  $J = 2$  Hz);  $^{19}\text{F NMR}$  (375 MHz,  $\text{CDCl}_3$ ):  $\delta$  2.6 (d,  $J = 7.6$  Hz).

## X-ray crystallographic analyses

A crystal (0.055 x 0.081 x 0.104 mm<sup>3</sup>) was attached to a nylon loop and mounted on a Rigaku Oxford Diffraction XtaLAB Synergy four-circle diffractometer equipped with a HyPix-6000HE area detector for data collection at 100 K (Rigaku Oxford Diffraction. *CrysAlisPro Software system*, version 1.171.39.7f; Rigaku Corporation: Oxford, UK, 2015). A preliminary set of cell constants and an orientation matrix were calculated from reflections harvested from a sampling of reciprocal space. Full data collections were carried out using CuK $\alpha$  radiation (1.54184 Å, PhotonJet-S Cu 50W Microfocus) with frame times ranging from three to seven seconds, frame widths of 0.5 degrees, and a detector distance of approximately four cm. The intensity data were scaled and corrected for absorption, and final cell constants were calculated from the xyz centroids of strong reflections from the actual data collections after integration. Space group  $P2_1$  was determined based on systematic absences and intensity statistics. Structures were solved using SHELXT (Sheldrick, G. M. *SHELXT*, version 2014/5; University of Göttingen: Göttingen, Germany) and refined using SHELXL (against  $F^2$ ) (Sheldrick, G. M. *SHELXL-2016/6*; *Acta Crystallogr.* **2015**, *C71*, 3-8.). All non-hydrogen atoms were refined with anisotropic displacement parameters. All hydrogen atoms were placed in ideal positions and refined as riding atoms with relative isotropic displacement parameters. The final full matrix least squares refinement converged to  $R1 = 0.0294$  ( $F^2$ ,  $I > 2\sigma(I)$ ) and  $wR2 = 0.0796$  ( $F^2$ , all data). The absolute configuration was determined by anomalous dispersion effects (Parsons, S; Flack, H. D.; Wagner, T. *Acta Crystallogr.* **2013**, *B69*, 249-259).

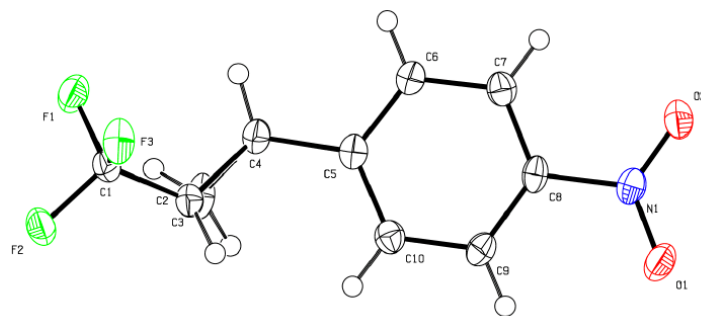

**Figure S3.** ORTEP of **10b** with ellipsoids drawn at the 50% probability level. Hydrogen atoms were located in the difference Fourier map and refined freely. They are represented here as spheres of arbitrary radius for clarity. Absolute configuration was determined by anomalous dispersion effects produced with CuK $\alpha$  radiation.

**Table S3:** Crystal data summary for **10b**.

|                                             |                                                               |
|---------------------------------------------|---------------------------------------------------------------|
| Empirical Formula                           | C <sub>10</sub> H <sub>8</sub> F <sub>3</sub> NO <sub>2</sub> |
| FW                                          | 231.17                                                        |
| T (K)                                       | 100.0(1)                                                      |
| crystal system                              | monoclinic                                                    |
| space group                                 | <i>P</i> 2 <sub>1</sub>                                       |
| <i>a</i> (Å)                                | 8.0948(3)                                                     |
| <i>b</i> (Å)                                | 6.72581(17)                                                   |
| <i>c</i> (Å)                                | 9.5368(3)                                                     |
| $\beta$ (deg)                               | 110.999(4)                                                    |
| <i>V</i> (Å <sup>3</sup> )                  | 484.74(3)                                                     |
| <i>Z</i>                                    | 2                                                             |
| $\rho_{\text{calcd}}$ (g cm <sup>-3</sup> ) | 1.584                                                         |
| $\mu$ (mm <sup>-1</sup> )                   | 1.312                                                         |
| color, shape                                | colorless, plate                                              |
| reflections collected                       | 16801                                                         |
| reflections independent                     | 1694                                                          |
| $R_{\text{int}}^a$                          | 0.0722                                                        |
| reflections observed                        | 1645                                                          |
| number of parameters                        | 145                                                           |
| GOF <sup>b</sup> on $F^2$                   | 1.065                                                         |
| $R1$ [ $I > 2\sigma(I)$ ] <sup>c</sup>      | 0.0294                                                        |
| $wR2^d$                                     | 0.0796                                                        |

<sup>a</sup> $R_{\text{int}} = \Sigma |F_o^2 - \langle F_o^2 \rangle| / \Sigma F_o^2$ . <sup>b</sup>GOF =  $S = [\Sigma w(F_o^2 - F_c^2)^2 / (m - n)]^{1/2}$ , where  $w = 1 / [\sigma^2(F_o^2) + (aP)^2 + bP]$ ,  $P = 1/3 \max(0, F_o^2) + 2/3F_c^2$ ,  $m$  = number of independent reflections, and  $n$  = number of parameters. <sup>c</sup> $R1 = \Sigma ||F_o| - |F_c|| / \Sigma |F_o|$ . <sup>d</sup> $wR2 = [\Sigma w(F_o^2 - F_c^2)^2 / \Sigma wF_o^2]^{1/2}$ .

# NMR Spectra

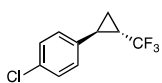

7.241  
7.224  
7.030  
7.013

2.319  
2.307  
2.299  
2.289  
2.279  
1.773  
1.760  
1.747  
1.733  
1.721  
1.708  
1.695  
1.367  
1.355  
1.345  
1.337  
1.325  
1.311  
1.119  
1.102  
1.090

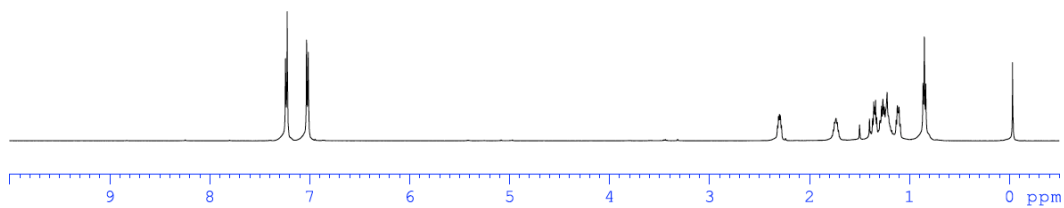

2.139  
2.000

0.987  
1.058  
1.277  
1.309

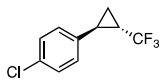

137.485  
132.585  
128.720  
127.929  
126.802  
124.647

23.422  
23.128  
22.834  
22.540  
19.049  
19.030  
10.802  
10.786

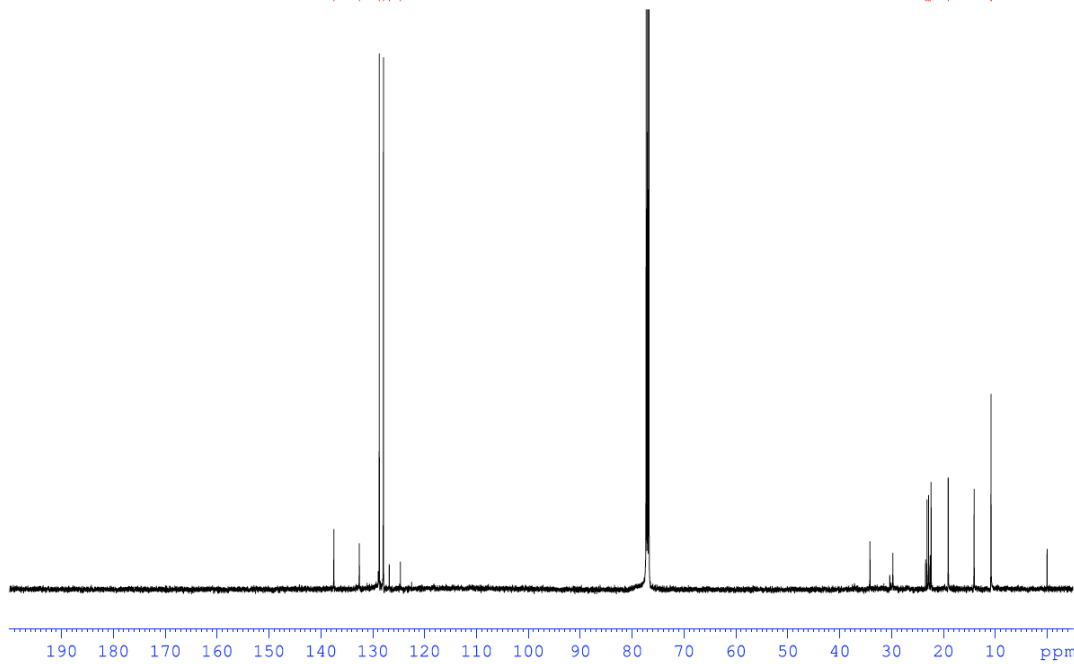



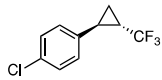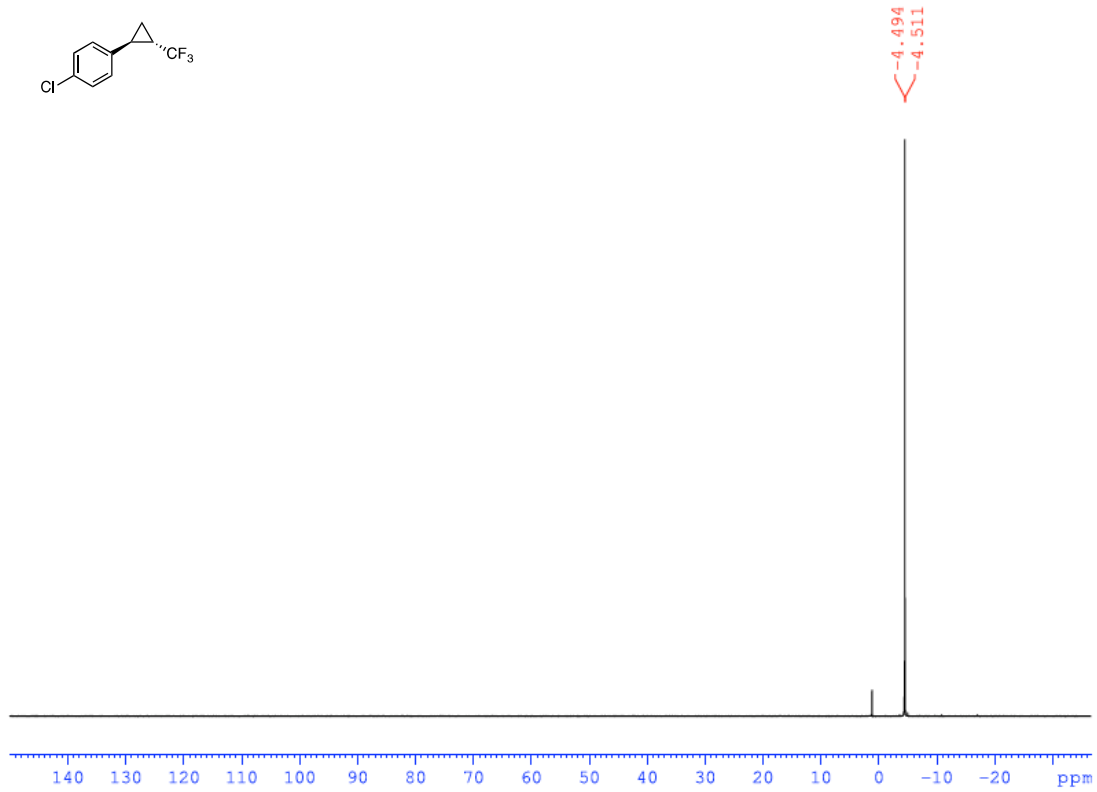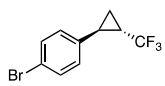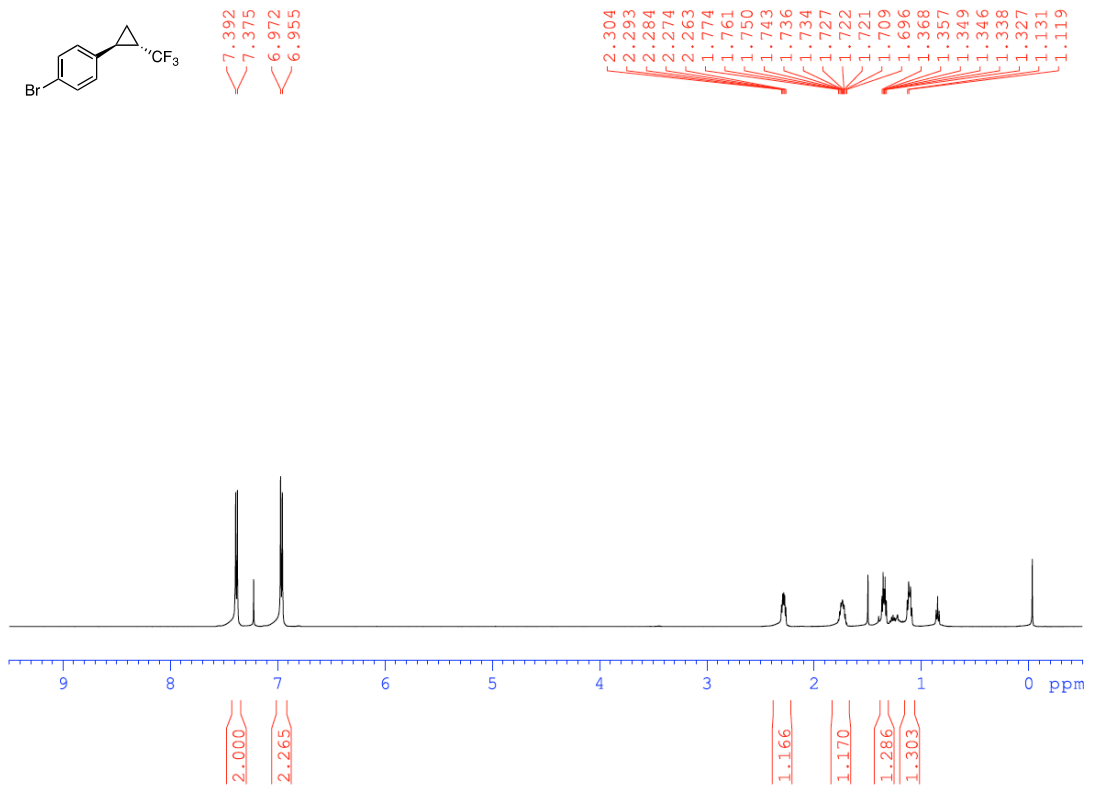

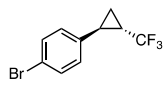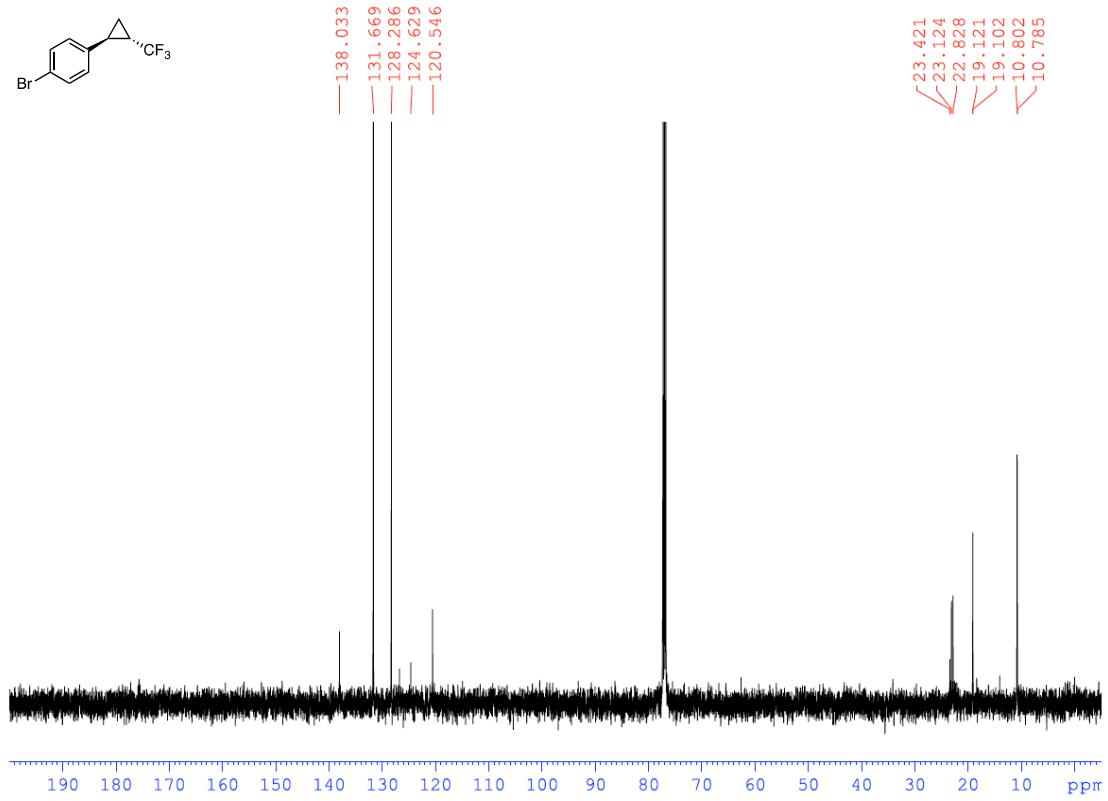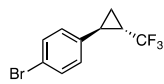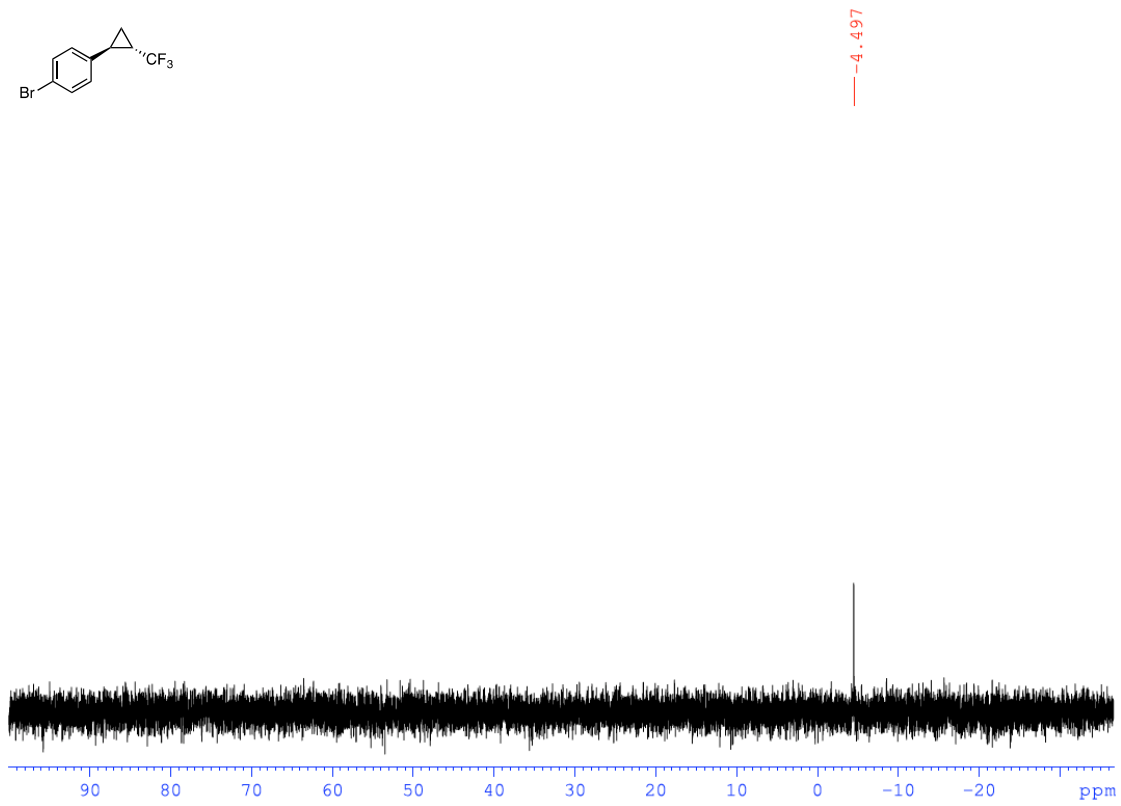

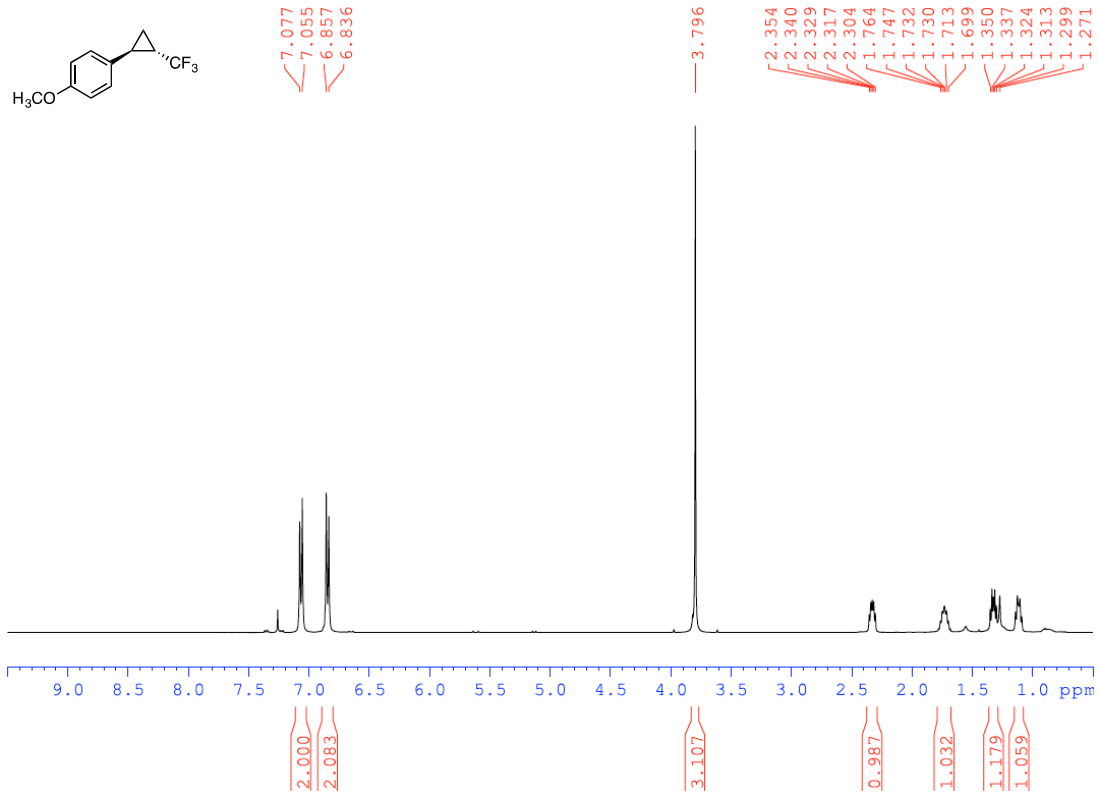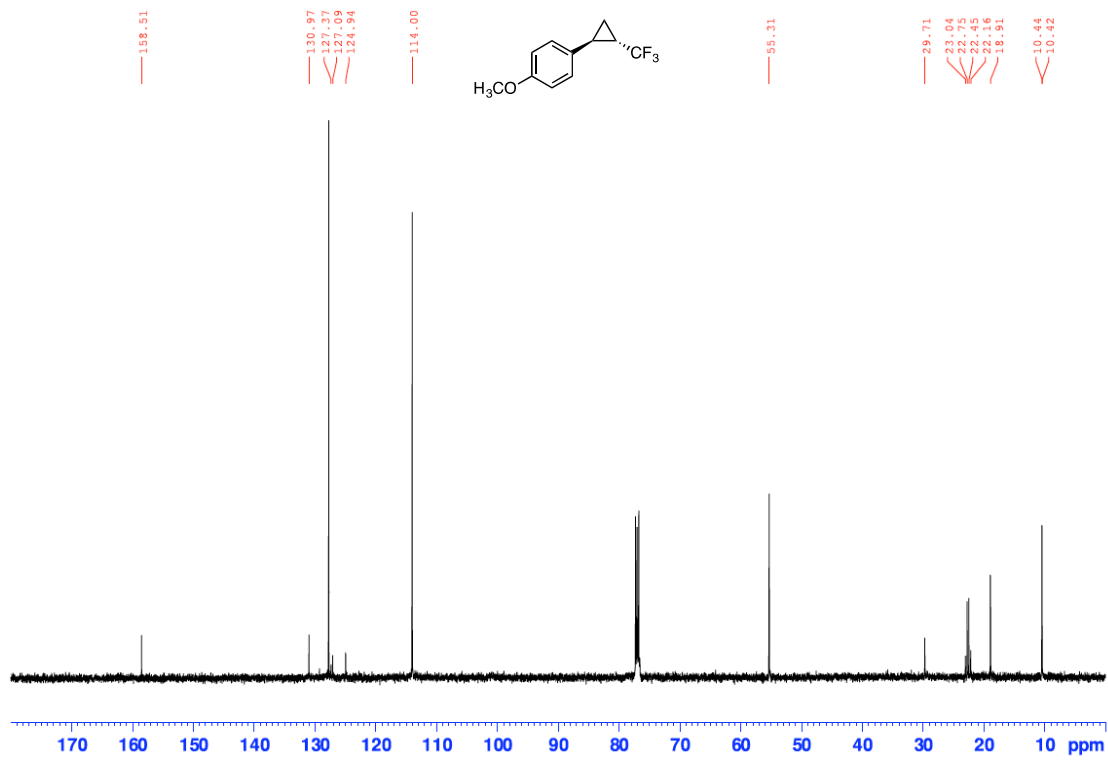

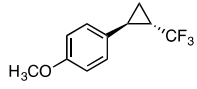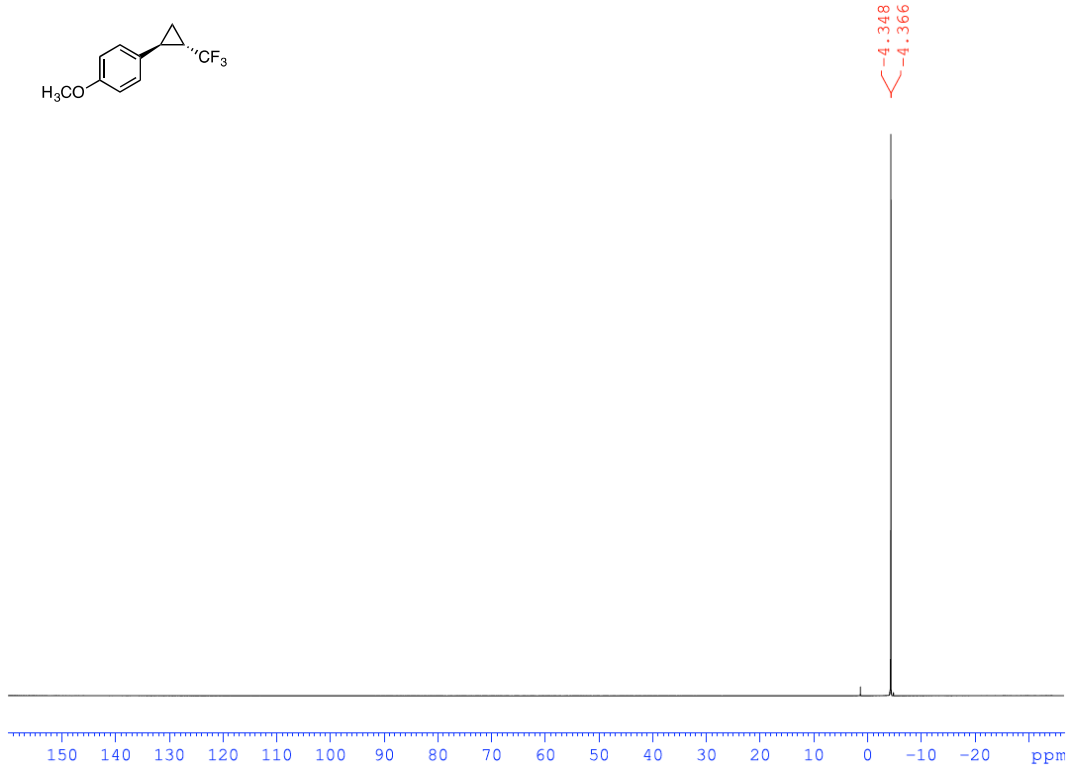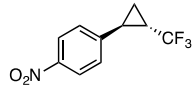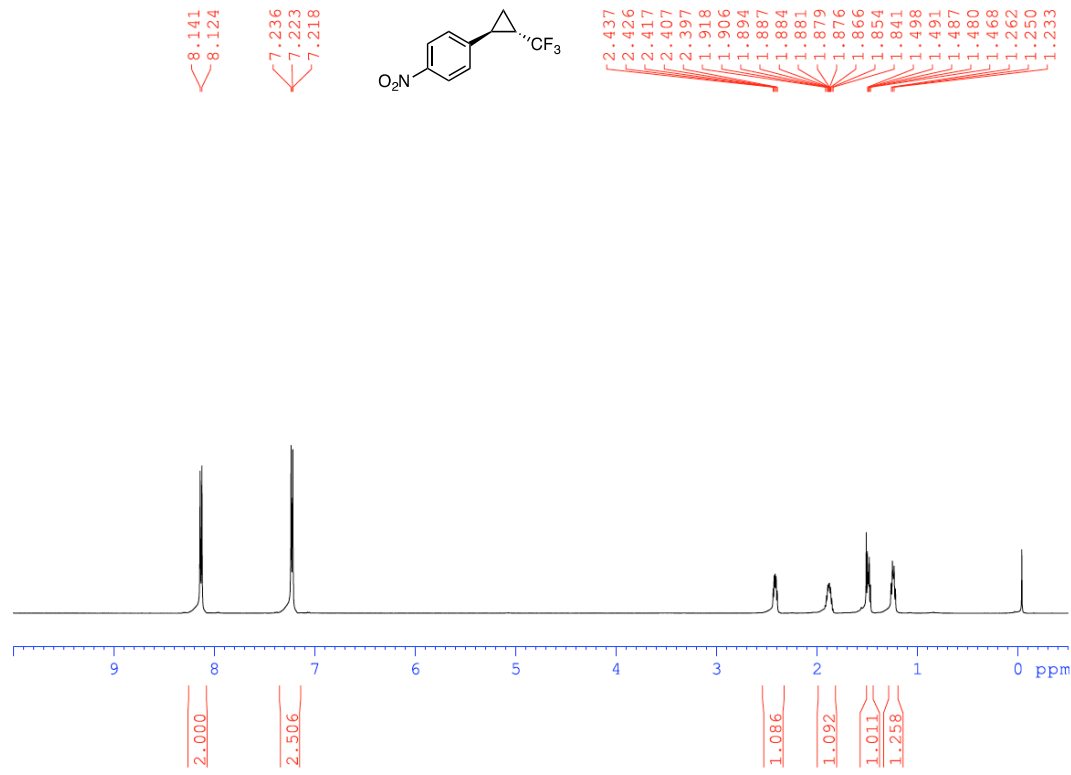

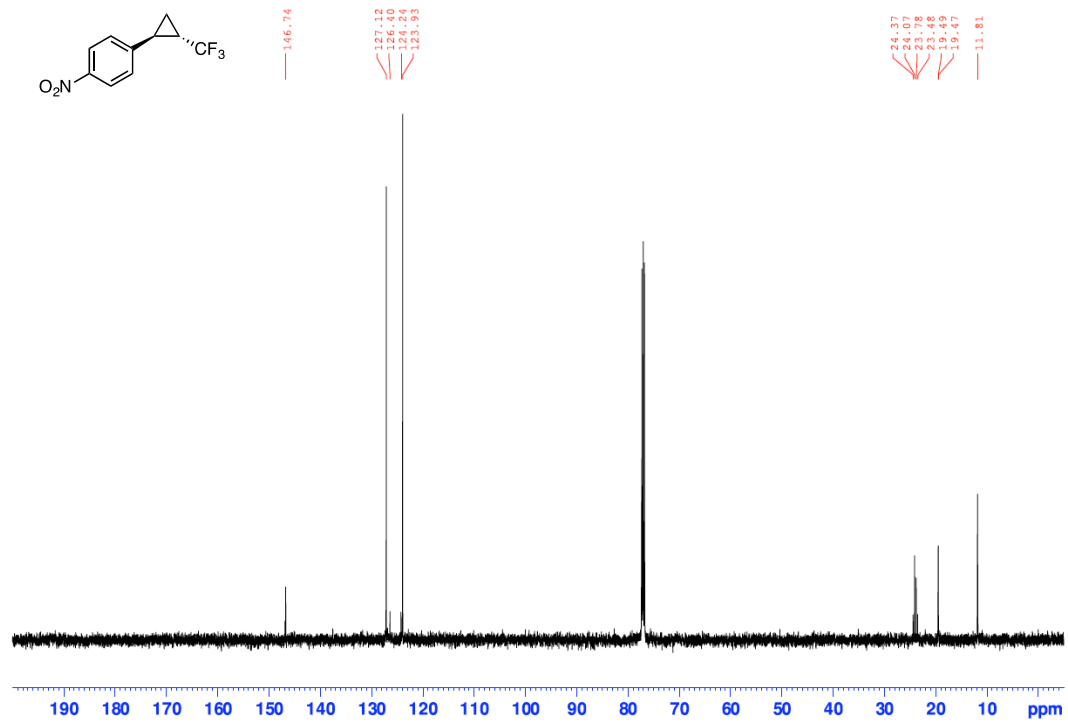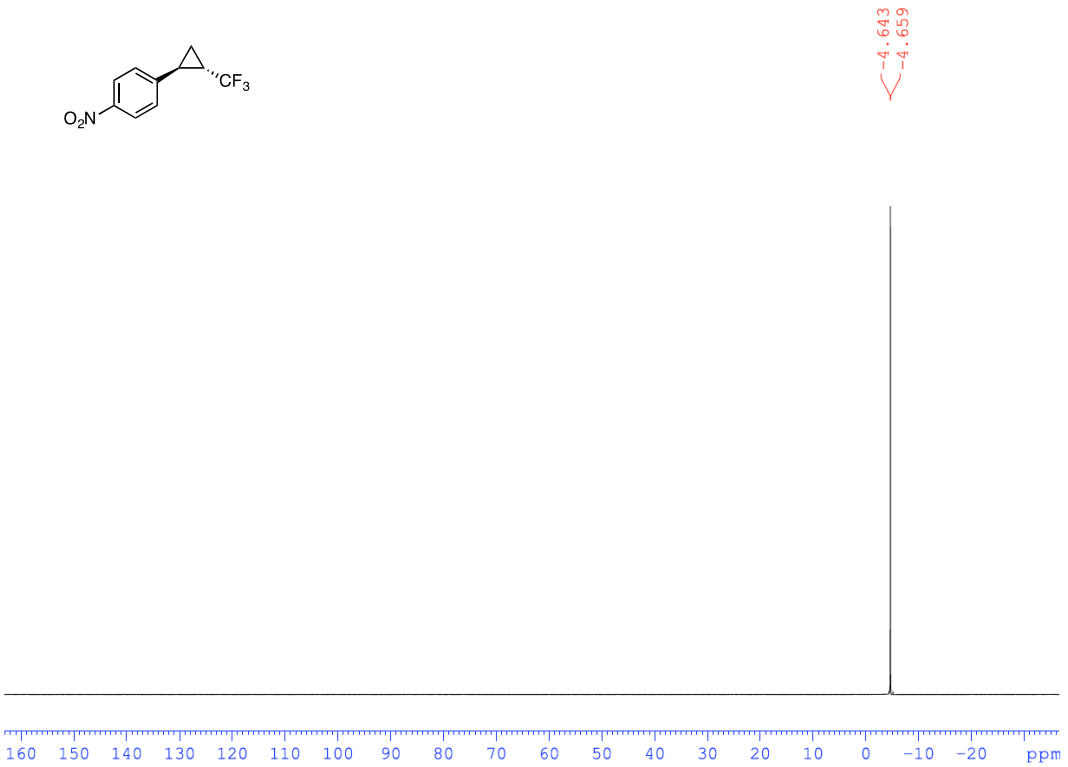

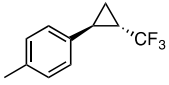

7.081  
7.065  
6.989  
6.974

2.312  
2.287  
2.272  
1.763  
1.749  
1.738  
1.736  
1.725  
1.722  
1.711  
1.698  
1.684  
1.520  
1.309  
1.299  
1.290  
1.279  
1.120  
1.108  
1.091  
1.079

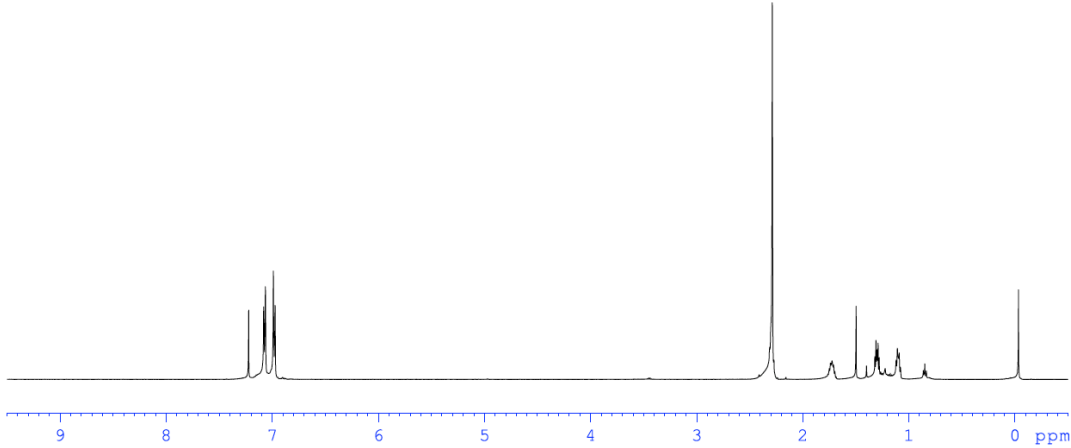

2.194  
2.000

4.475  
1.043  
1.356  
1.142

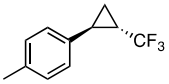

136.421  
135.971  
129.250  
126.422  
124.894

23.222  
22.933  
22.640  
22.346  
20.978  
19.248  
10.673  
10.656

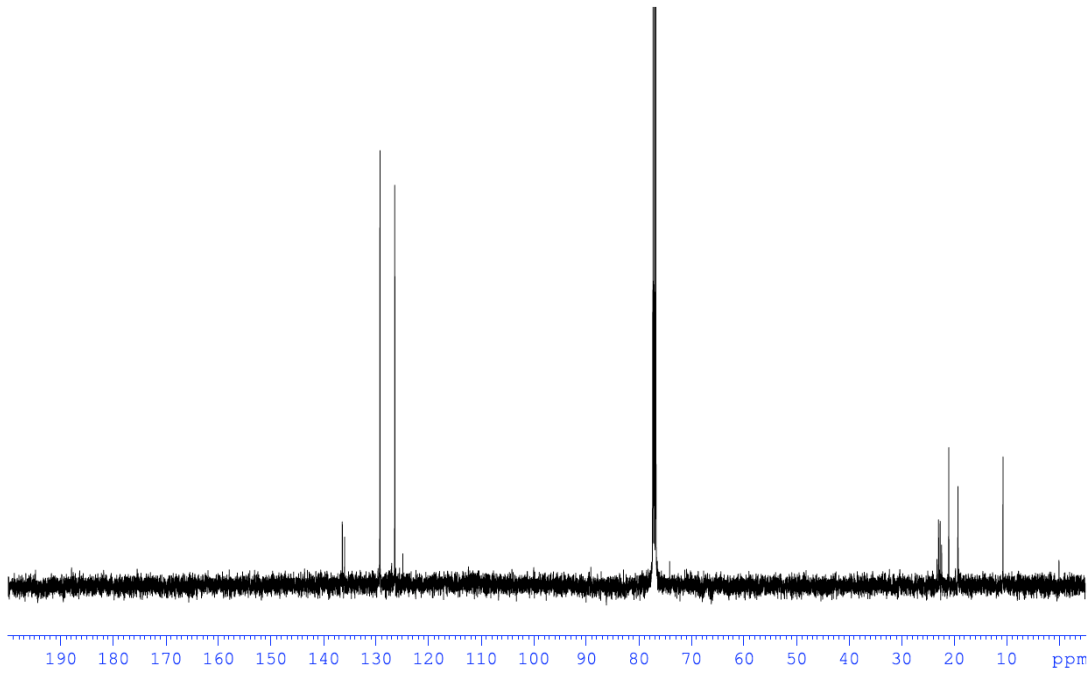

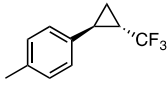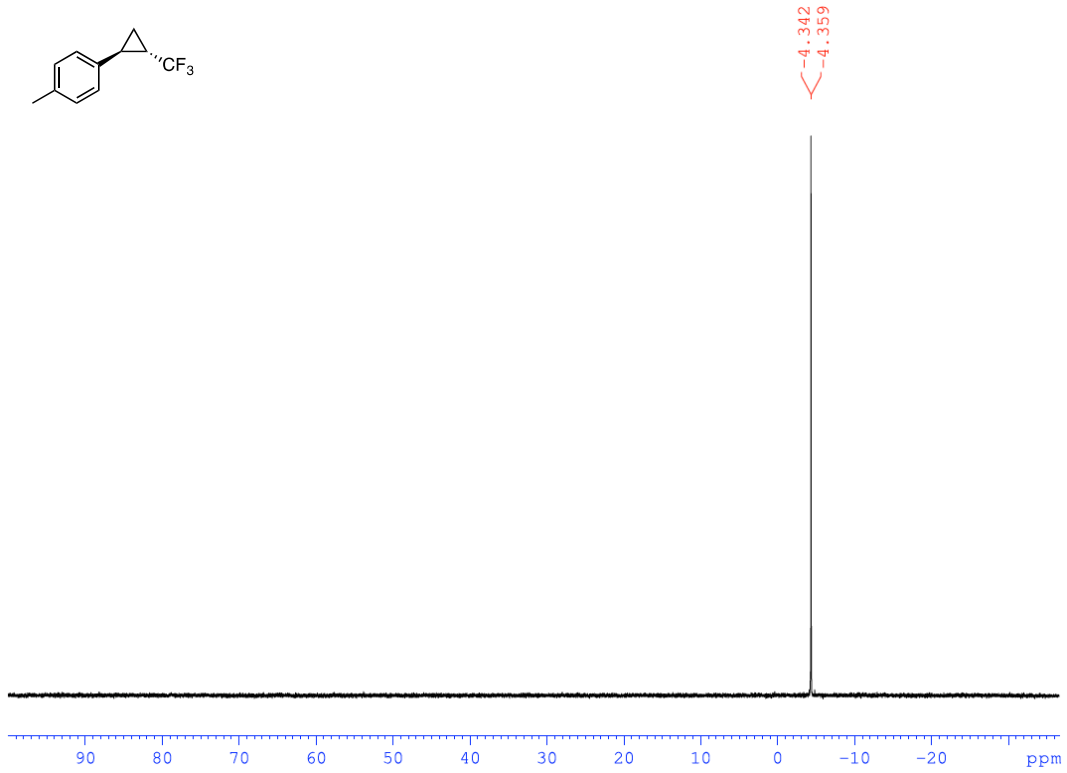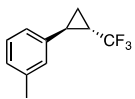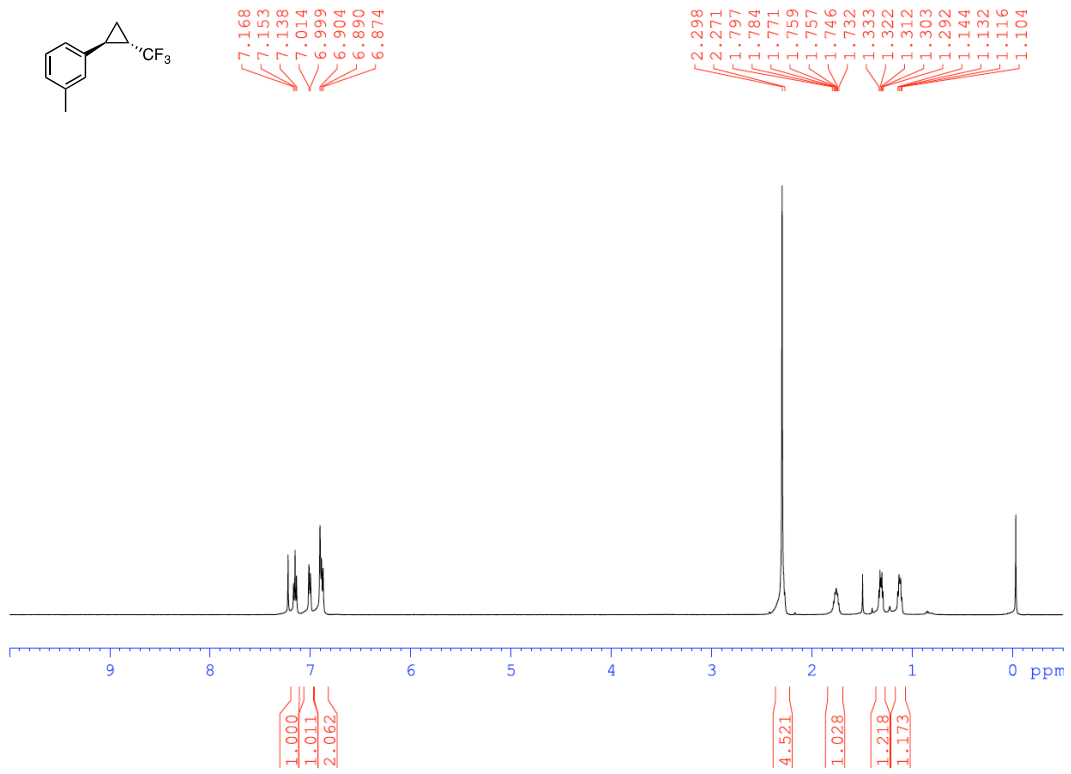

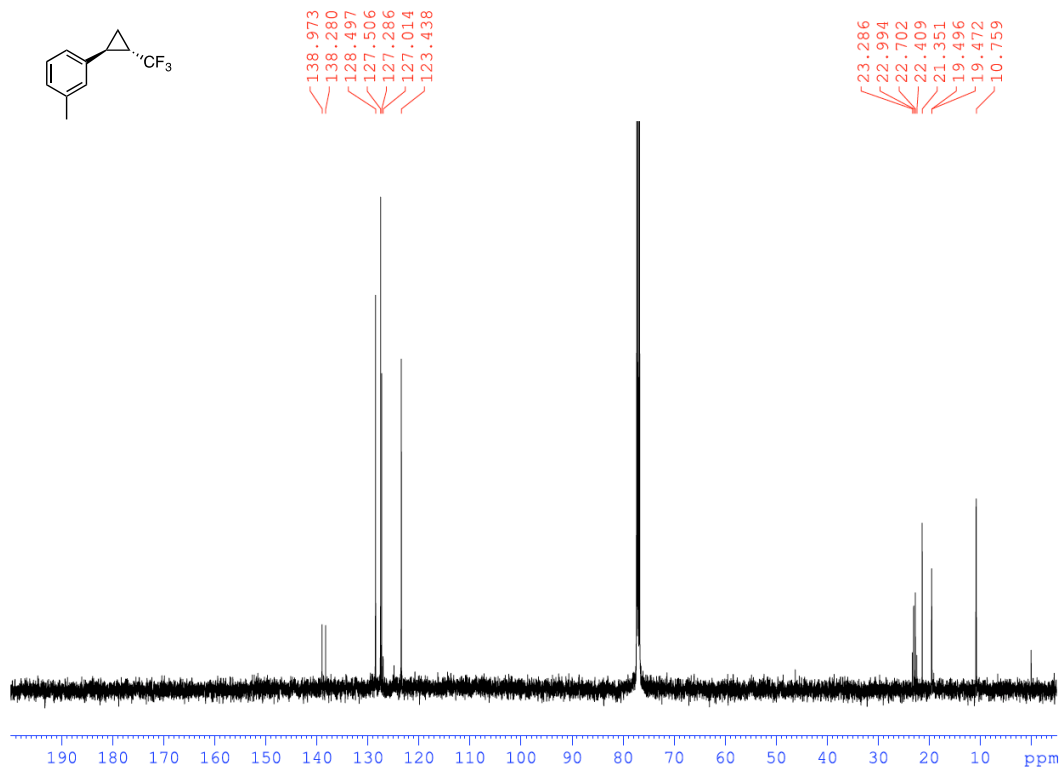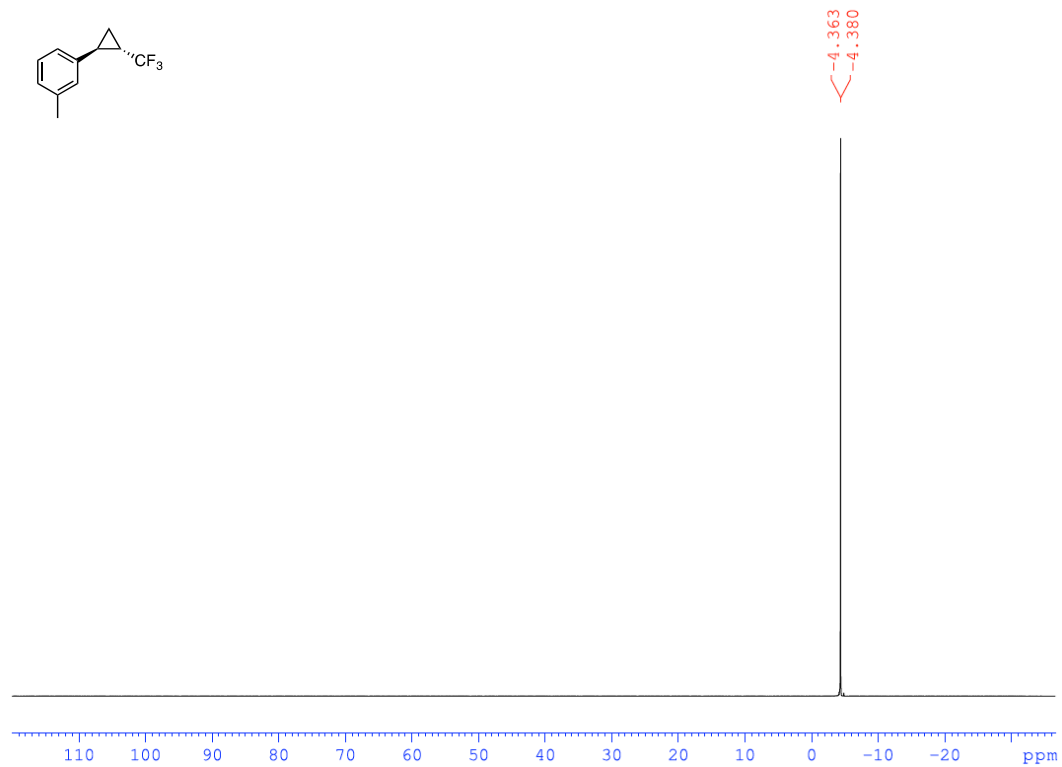



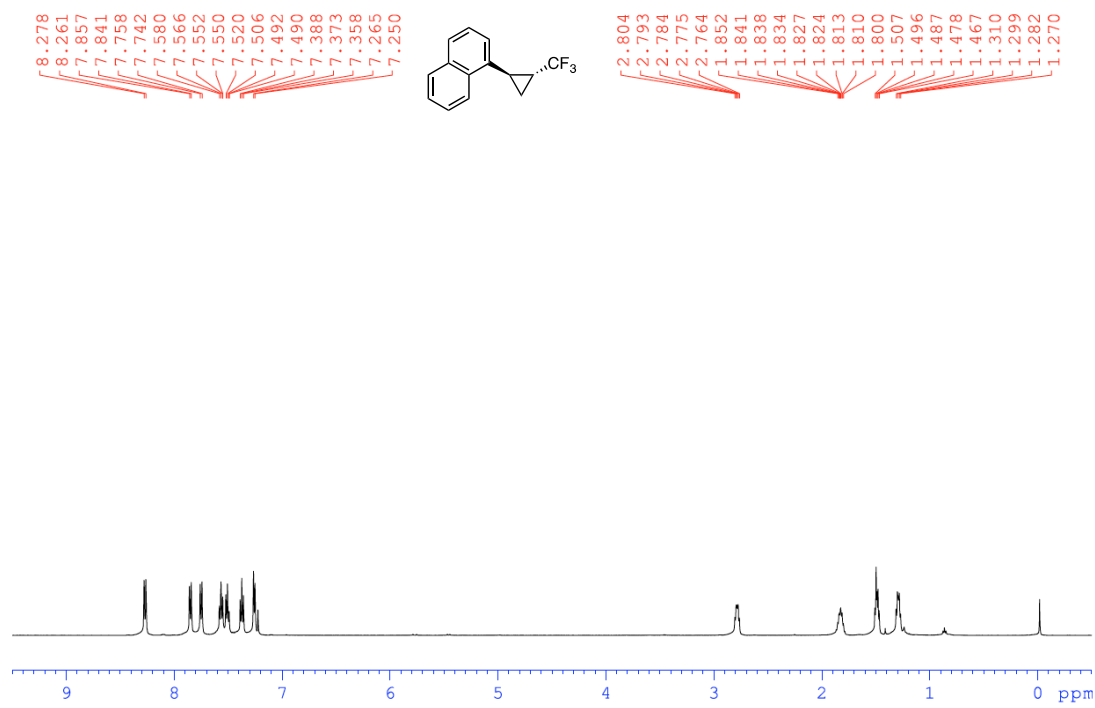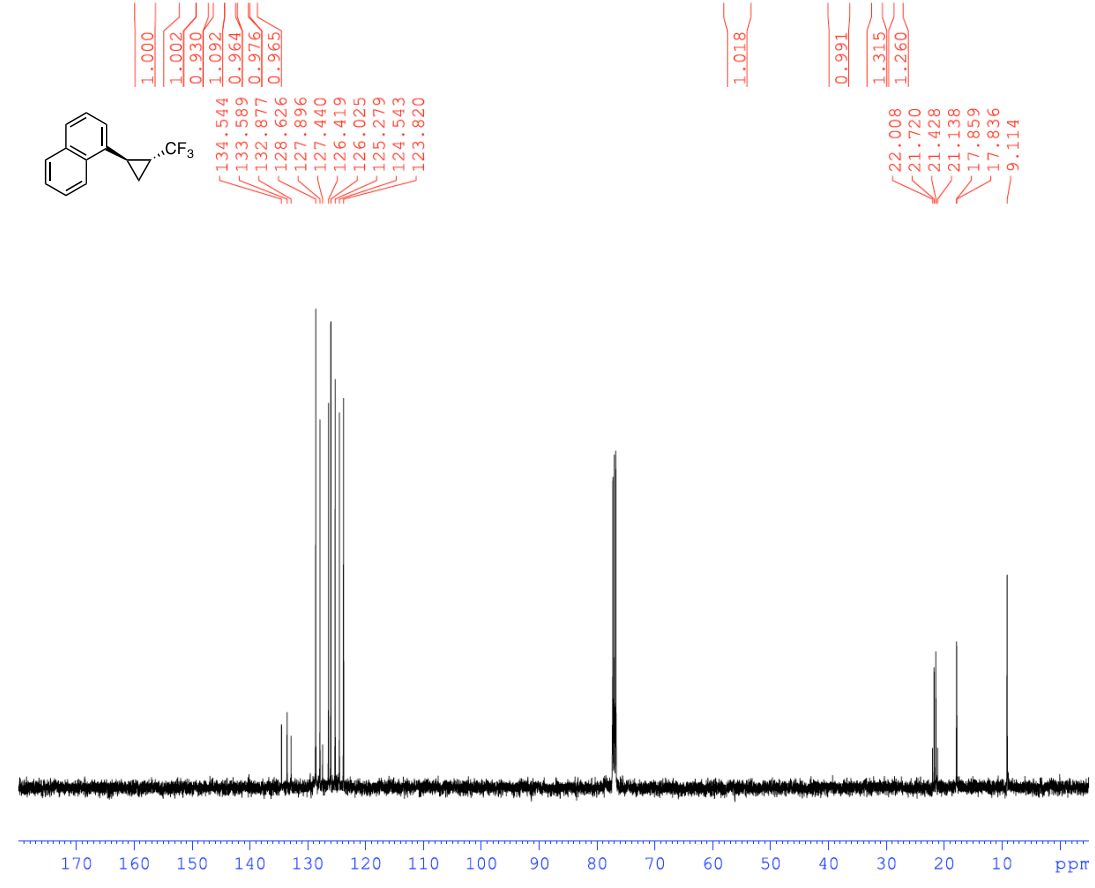

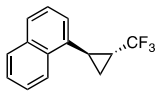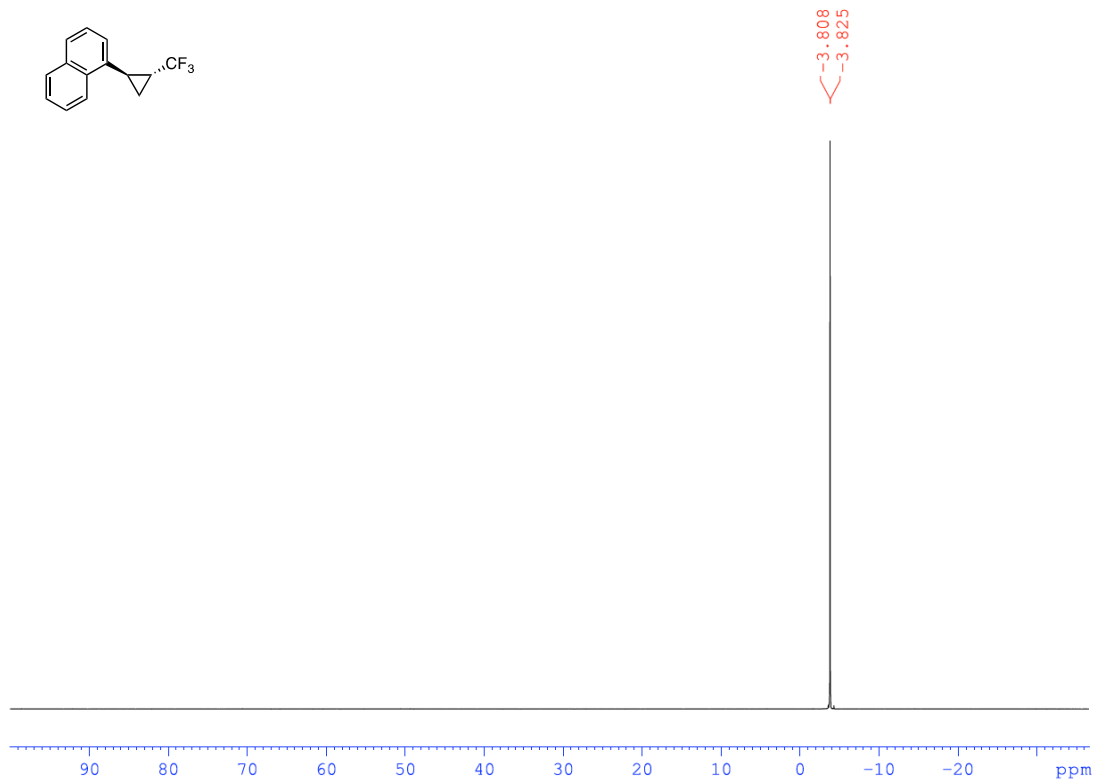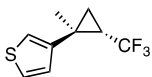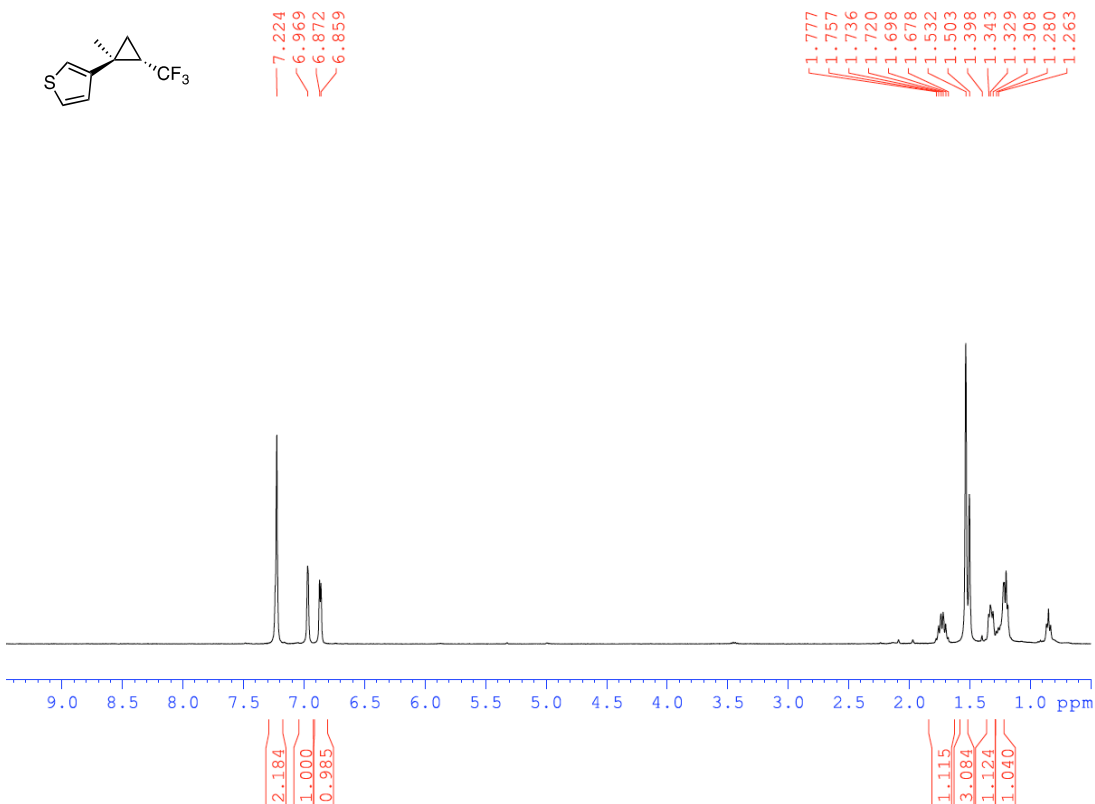

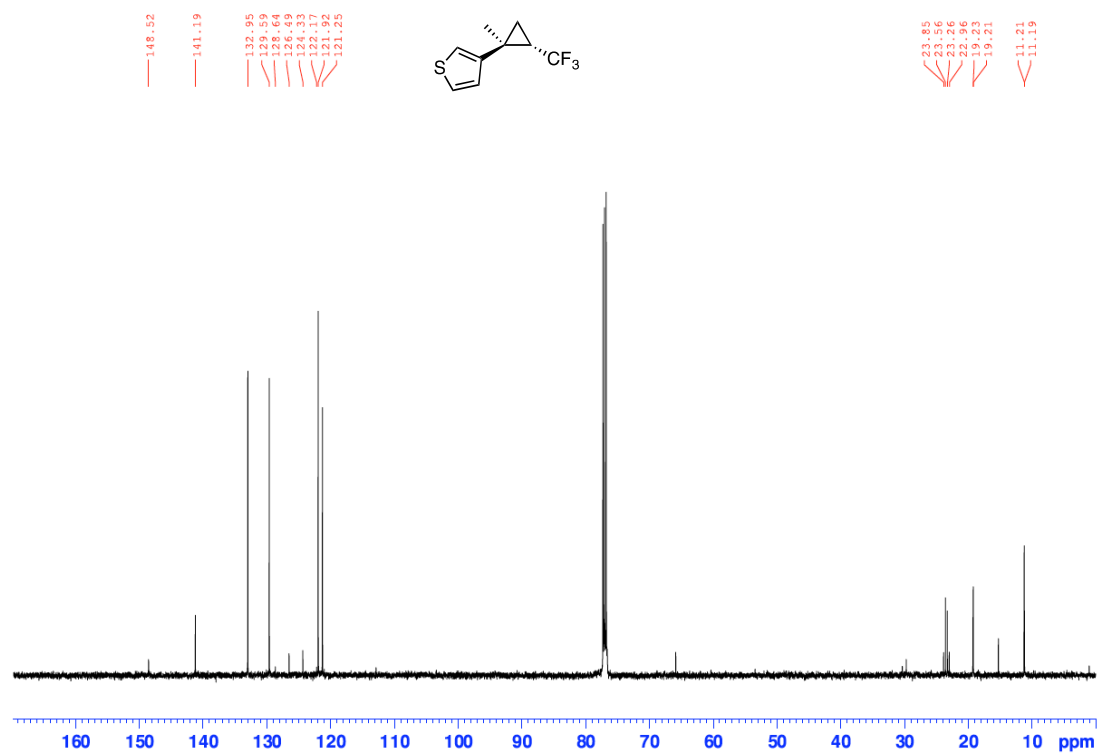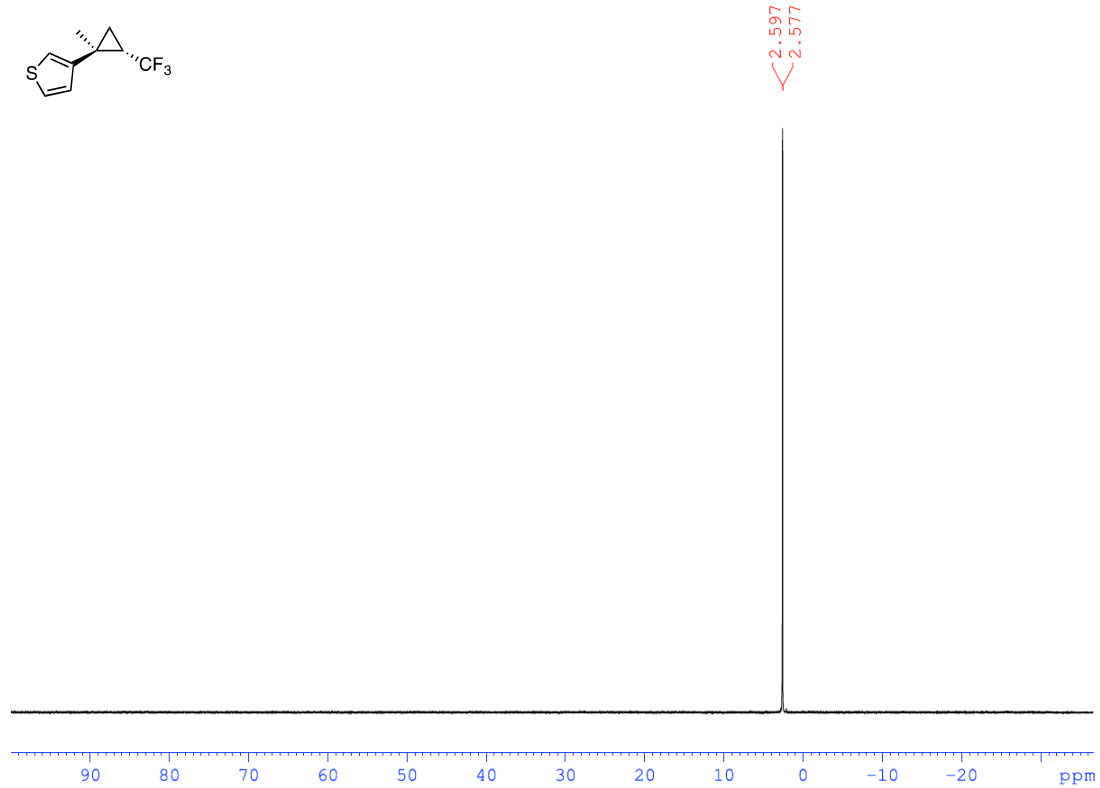

Supplement: NIHMS928942-supplement-Supporting_Information.pdf [file NIHMS928942-supplement-Supporting_Information.pdf]
